# Supplementary material for: Relationship of dietary natural folate and synthetic folic acid co-exposure patterns with biological aging: findings from NHANES 2003–2018
Source: Royal Society of Chemistry journal article supplement (doi:10.1039/d4fo01241k), 2024-01-01
Supplement: d4fo01241k1.pdf [file d4fo01241k1.pdf]

Supplementary Table 1 Baseline characteristics of participants according to quartiles of total folate and dietary folate intake.

| Characteristics                      | Quartiles of food natural folate (DFE, mcg/d) |                                 |                                |                     | Quartiles of food synthetic acid (DFE, mcg/d) |                               |                                 |                     |
|--------------------------------------|-----------------------------------------------|---------------------------------|--------------------------------|---------------------|-----------------------------------------------|-------------------------------|---------------------------------|---------------------|
|                                      | Q1                                            | Q2                              | Q3                             | Q4                  | Q1                                            | Q2                            | Q3                              | Q4                  |
|                                      | (<135.00)<br>N=4727                           | (135.01 -<br><188.00)<br>N=4743 | (188.01-<br><258.50)<br>N=4707 | (≥258.51)<br>N=4712 | (<81.00)<br>N=4744                            | (81.01-<br><137.50)<br>N=4703 | (137.51 -<br><224.50)<br>N=4738 | (≥224.51)<br>N=4704 |
| Age (years)                          | 53.22 (17.96)                                 | 54.28 (17.72)                   | 53.67 (16.65)                  | 51.84 (16.00)       | 54.98 (16.57)                                 | 53.68 (16.97)                 | 52.34 (17.11)                   | 52.01 (17.68)       |
| Men [N, (%)]                         | 1713 (36.2)                                   | 2159 (45.5)                     | 2498 (53.1)                    | 3035 (64.4)         | 1853 (39.1)                                   | 2140 (45.5)                   | 2494 (52.6)                     | 2918 (62.0)         |
| Non-Hispanic white [N, (%)]          | 2064 (43.7)                                   | 2393 (50.5)                     | 2405 (51.1)                    | 2295 (48.7)         | 2148 (45.3)                                   | 2196 (46.7)                   | 2206 (46.6)                     | 2607 (55.4)         |
| Family income-poverty ratio          | 2.25 (1.49)                                   | 2.60 (1.55)                     | 2.84 (1.60)                    | 3.02 (1.65)         | 2.56 (1.60)                                   | 2.66 (1.60)                   | 2.65 (1.59)                     | 2.84 (1.60)         |
| College graduate or above (%)        | 3304 (69.9)                                   | 3620 (76.3)                     | 3691 (78.4)                    | 3794 (80.5)         | 3501 (73.8)                                   | 3530 (75.1)                   | 3630 (76.6)                     | 3748 (79.7)         |
| Mild work activity [N, (%)]          | 3441 (72.8)                                   | 3250 (68.5)                     | 2903 (61.7)                    | 2585 (54.9)         | 3154 (66.5)                                   | 3143 (66.8)                   | 3055 (64.5)                     | 2827 (60.1)         |
| Smoking [N, (%)]                     | 2308 (48.8)                                   | 2210 (46.6)                     | 2150 (45.7)                    | 2213 (47.0)         | 2284 (48.1)                                   | 2249 (47.8)                   | 2241 (47.3)                     | 2107 (44.8)         |
| None alcohol consumption [N, (%)]    | 3865 (81.8)                                   | 3531 (74.4)                     | 3139 (66.7)                    | 2844 (60.4)         | 3332 (70.2)                                   | 3347 (71.2)                   | 3366 (71.0)                     | 3334 (70.9)         |
| BMI (kg/m <sup>2</sup> )             | 30.17 (7.16)                                  | 29.76 (6.58)                    | 29.70 (6.88)                   | 29.02 (6.39)        | 29.93 (7.06)                                  | 29.77 (6.65)                  | 29.77 (6.64)                    | 29.18 (6.72)        |
| AHEI                                 | 45.23 (10.14)                                 | 43.31 (9.76)                    | 42.45 (9.64)                   | 42.90 (9.94)        | 39.24 (8.36)                                  | 42.12 (9.07)                  | 44.53 (9.70)                    | 48.03 (10.32)       |
| Total energy intake (kcal/d)         | 1465.40<br>(503.20)                           | 1848.08<br>(562.98)             | 2122.37<br>(614.55)            | 2491.93<br>(718.22) | 1590.75<br>(589.88)                           | 1872.01<br>(611.21)           | 2112.50<br>(668.25)             | 2352.21<br>(735.03) |
| Vitamin B12 (mcg/d)                  | 3.58 (3.25)                                   | 4.65 (3.84)                     | 5.30 (4.12)                    | 6.63 (9.23)         | 3.77 (5.78)                                   | 4.21 (4.62)                   | 5.00 (5.93)                     | 7.19 (5.95)         |
| Total folate (DFE, mcg/d)            | 457.90<br>(392.58)                            | 592.96<br>(411.41)              | 720.64<br>(610.37)             | 874.77<br>(532.92)  | 439.27<br>(575.00)                            | 527.98<br>(391.44)            | 653.91<br>(353.44)              | 1025.86<br>(515.12) |
| Food natural folate (DFE, mcg/d)     | 100.53<br>(24.97)                             | 161.30<br>(15.21)               | 220.66<br>(20.05)              | 354.48<br>(98.55)   | 189.90<br>(109.35)                            | 197.41<br>(100.17)            | 213.03<br>(102.63)              | 236.08<br>(111.80)  |
| Food synthetic acid (DFE, mcg/d)     | 137.55<br>(117.74)                            | 169.52<br>(137.73)              | 191.47<br>(159.48)             | 202.37<br>(162.86)  | 49.67<br>(20.57)                              | 108.68<br>(16.13)             | 175.90<br>(24.72)               | 367.54<br>(170.02)  |
| Dietary folate (DFE, mcg/d)          | 334.29<br>(205.28)                            | 449.38<br>(235.45)              | 546.05<br>(272.57)             | 698.51<br>(295.10)  | 274.25<br>(113.01)                            | 382.02<br>(105.23)            | 512.04<br>(112.64)              | 860.88<br>(314.86)  |
| Folic acid supplement taken [N, (%)] | 870 (18.4)                                    | 1038 (21.9)                     | 1179 (25.0)                    | 1241 (26.3)         | 1115 (23.5)                                   | 1002 (21.3)                   | 1062 (22.4)                     | 1149 (24.4)         |
| <sup>c</sup> Diabetes [N, (%)]       | 1049 (22.2)                                   | 1002 (21.1)                     | 928 (19.7)                     | 829 (17.6)          | 1067 (22.5)                                   | 982 (20.9)                    | 938 (19.8)                      | 821 (17.5)          |
| <sup>d</sup> Dyslipidmia [N, (%)]    | 2457 (52.0)                                   | 2443 (51.5)                     | 2212 (47.0)                    | 2113 (44.8)         | 2457 (51.8)                                   | 2354 (50.1)                   | 2279 (48.1)                     | 2135 (45.4)         |

|                                              |             |             |             |             |             |             |             |             |
|----------------------------------------------|-------------|-------------|-------------|-------------|-------------|-------------|-------------|-------------|
| <sup>e</sup> Hypertension [N, (%)]           | 710 (15.0)  | 657 (13.9)  | 544 (11.6)  | 434 (9.2)   | 644 (13.6)  | 636 (13.5)  | 536 (11.3)  | 529 (11.2)  |
| <sup>f</sup> Cardiovascular disease [N, (%)] | 2662 (56.3) | 2805 (59.1) | 2785 (59.2) | 2767 (58.7) | 2725 (57.4) | 2721 (57.9) | 2816 (59.4) | 2757 (58.6) |

Abbreviations: AHEI, Alternative Healthy Eating Index; BMI, body mass index; TFE, total folate equivalent; DFE, dietary folate equivalent; Q, quartile; N, number.

a Continuous variables are presented as mean and standard deviation. Categorical variables are presented as percentages.

b P value for difference after the Bonferroni correction for each variable among four groups according to quartiles of TFE or DFE.

c Diabetes was defined by a self-reported diagnosis, serum triglyceride  $\geq 2.26$  mmol/L, or serum cholesterol  $\geq 6.22$  mmol/L, or low-density lipoprotein  $\geq 4.14$  mmol/L, or related drugs used.

d Dyslipidemia was defined as serum triglyceride  $\geq 2.26$  mmol/L, or serum glycohemoglobin  $\geq 6.5\%$ , or a serum fasting plasma glucose level  $\geq 7.0$  mmol/L, or related drugs used.

e Participants who met one or more of the following criteria were considered as people with hypertension 1) a self-reported diagnosis, 2) mean systolic blood pressure  $\geq 140$  mmHg and/or diastolic blood pressure  $\geq 90$  mmHg, 3) taking the prescription for hypertension

f Cardiovascular disease was defined by a self-reported congestive heart failure, coronary heart disease, or heart attack.

Supplementary Table 2 Baseline characteristics of participants according to quartiles of serum total folate.

| Characteristics                              | Serum total folate (mmol/l) |                               |                               |                          |
|----------------------------------------------|-----------------------------|-------------------------------|-------------------------------|--------------------------|
|                                              | Q1<br>(≤11.70)<br>N=4388    | Q2<br>(11.71-19.00)<br>N=4313 | Q3<br>(19.01-32.00)<br>N=4354 | Q4<br>(>32.01)<br>N=4343 |
| Age (years)                                  | 49.54 (16.23)               | 52.30 (16.81)                 | 53.81 (17.27)                 | 56.32 (17.65)            |
| Men [N, (%)]                                 | 2373 (55.2)                 | 2202 (50.0)                   | 2073 (47.6)                   | 1835 (42.3)              |
| Non-Hispanic white [N, (%)]                  | 1989 (46.3)                 | 2210 (50.2)                   | 2222 (51.0)                   | 2116 (48.7)              |
| Family income-poverty ratio                  | 2.56 (1.60)                 | 2.72 (1.61)                   | 2.71 (1.60)                   | 2.73 (1.59)              |
| College graduate or above (%)                | 3048 (70.9)                 | 3298 (74.9)                   | 3392 (77.9)                   | 3467 (79.8)              |
| Mild work activity [N, (%)]                  | 2845 (66.2)                 | 2729 (62.0)                   | 2764 (63.5)                   | 2835 (65.3)              |
| Smoking [N, (%)]                             | 2328 (54.2)                 | 2094 (47.5)                   | 1951 (44.8)                   | 1822 (42.0)              |
| None alcohol consumption [N, (%)]            | 2931 (68.2)                 | 2994 (68.0)                   | 3081 (70.8)                   | 3282 (75.6)              |
| BMI (kg/m <sup>2</sup> )                     | 30.32 (7.05)                | 29.69 (6.65)                  | 29.56 (6.79)                  | 28.98 (6.39)             |
| AHEI                                         | 39.41 (8.58)                | 41.88 (9.08)                  | 44.29 (9.71)                  | 47.12 (10.08)            |
| Total energy intake (kcal/d)                 | 2039.69 (746.16)            | 1989.47 (715.08)              | 1966.19 (691.17)              | 1909.78 (677.49)         |
| Vitamin B12 (mcg/d)                          | 14.20 (93.09)               | 24.47 (156.95)                | 52.88 (326.67)                | 105.75 (454.57)          |
| Total folate (DFE, mcg/d)                    | 474.59 (286.60)             | 576.77 (381.08)               | 697.34 (499.66)               | 879.71 (706.43)          |
| Food natural folate (DFE, mcg/d)             | 193.85 (97.88)              | 209.09 (104.03)               | 214.40 (107.98)               | 216.41 (114.33)          |
| Food synthetic folic acid (DFE, mcg/d)       | 152.03 (114.45)             | 178.09 (143.66)               | 186.20 (150.04)               | 186.23 (167.97)          |
| Dietary folate (DFE, mcg/d)                  | 452.40 (235.98)             | 511.90 (279.46)               | 530.92 (291.83)               | 532.79 (316.79)          |
| Folic acid supplement taken [N, (%)]         | 187 (4.4)                   | 506 (11.5)                    | 1132 (26.0)                   | 2065 (47.5)              |
| <sup>c</sup> Diabetes [N, (%)]               | 741 (17.2)                  | 822 (18.7)                    | 850 (19.5)                    | 1005 (23.1)              |
| <sup>d</sup> Dyslipidmia [N, (%)]            | 2640 (61.5)                 | 2620 (59.5)                   | 2441 (56.1)                   | 2473 (56.9)              |
| <sup>e</sup> Hypertension [N, (%)]           | 1964 (45.7)                 | 2093 (47.5)                   | 2144 (49.2)                   | 2227 (51.3)              |
| <sup>f</sup> Cardiovascular disease [N, (%)] | 505 (11.8)                  | 502 (11.4)                    | 514 (11.8)                    | 609 (14.0)               |

Abbreviations: AHEI, Alternative Healthy Eating Index; BMI, body mass index; Total folate, Total folate equivalent; Dietary folate, dietary folate equivalent; Q, quartile; N, number.

a Continuous variables are presented as mean and standard deviation. Categorical variables are presented as percentages.

b P value for difference after the Bonferroni correction for each variable among four groups according to quartiles of serum folate.

c Diabetes was defined by a self-reported diagnosis, serum triglyceride  $\geq 2.26$  mmol/L, or serum cholesterol  $\geq 6.22$  mmol/L, or low-density lipoprotein  $\geq 4.14$  mmol/L, or related drugs used.

d Dyslipidemia was defined as serum triglyceride  $\geq 2.26$  mmol/L, or serum glycohemoglobin  $\geq 6.5\%$ , or a serum fasting plasma glucose level  $\geq 7.0$  mmol/L, or related drugs used.

e Participants who met one or more of the following criteria were considered as people with hypertension 1) a self-reported diagnosis, 2) mean systolic blood pressure  $\geq 140$  mmHg and/or diastolic blood pressure  $\geq 90$  mmHg, 3) taking the prescription for hypertension

f Cardiovascular disease was defined by a self-reported congestive heart failure, coronary heart disease, or heart attack.

Supplementary Table 3 Components of biological ages.

|                                        | Albumin, g/L             | Alkaline phosphatase, U/L | C-reactive protein, mg/dL | Total cholesterol, mmol/L | Creatinine, umol/L | Glycated hemoglobin, % | Systolic blood pressure, mmHg | Blood urea nitrogen, mmol/L | Uric acid, umol/L | Lymphocyte percent, % | Mean cell volume, fL | White blood cell count, % |
|----------------------------------------|--------------------------|---------------------------|---------------------------|---------------------------|--------------------|------------------------|-------------------------------|-----------------------------|-------------------|-----------------------|----------------------|---------------------------|
| Total folate (DFE, mcg/d)              |                          |                           |                           |                           |                    |                        |                               |                             |                   |                       |                      |                           |
| <sup>b</sup> Q1 (<=347.00)             | <sup>a</sup> 41.90(0.10) | 72.23(0.49)               | 0.50(0.02)                | 5.23(0.03)                | 0.89(0.01)         | 5.71(0.02)             | 124.80(0.34)                  | 4.85(0.04)                  | 5.39(0.03)        | 30.15(0.17)           | 89.67(0.13)          | 7.49(0.05)                |
| Q2 (347.01 - <521.01)                  | 42.26(0.09)              | 70.67(0.56)               | 0.44(0.02)                | 5.18(0.02)                | 0.90(0.01)         | 5.63(0.02)             | 124.34(0.32)                  | 4.97(0.04)                  | 5.56(0.03)        | 30.15(0.17)           | 89.69(0.13)          | 7.39(0.04)                |
| Q3 (521.01 - <853.00)                  | 42.58(0.07)              | 70.08(0.56)               | 0.38(0.01)                | 5.17(0.02)                | 0.91(0.01)         | 5.64(0.02)             | 123.59(0.34)                  | 4.97(0.04)                  | 5.58(0.03)        | 30.25(0.15)           | 89.56(0.12)          | 7.33(0.05)                |
| Q4 (>=853.01)                          | 42.73(0.08)              | 67.90(0.36)               | 0.35(0.01)                | 5.07(0.02)                | 0.90(0.00)         | 5.64(0.02)             | 123.80(0.38)                  | 5.31(0.05)                  | 5.47(0.03)        | 30.18(0.17)           | 90.08(0.15)          | 7.09(0.06)                |
| <sup>c</sup> P value                   | 0.001                    | <0.001                    | <0.001                    | <0.001                    | <0.001             | 0.254                  | 0.001                         | <0.001                      | <0.001            | <0.001                | 0.154                | <0.001                    |
| Dietary folate (DFE, mcg/d)            |                          |                           |                           |                           |                    |                        |                               |                             |                   |                       |                      |                           |
| Q1 (<316.00)                           | 41.87(0.10)              | 72.23(0.53)               | 0.50(0.02)                | 5.22(0.03)                | 0.89(0.01)         | 5.72(0.02)             | 124.76(0.37)                  | 4.96(0.05)                  | 5.39(0.03)        | 30.24(0.16)           | 89.71(0.14)          | 7.45(0.06)                |
| Q2 (316.51 - <444.00)                  | 42.20(0.09)              | 70.30(0.48)               | 0.43(0.01)                | 5.17(0.03)                | 0.89(0.01)         | 5.64(0.01)             | 124.56(0.34)                  | 5.01(0.04)                  | 5.47(0.03)        | 30.00(0.16)           | 89.77(0.12)          | 7.31(0.05)                |
| Q3 (444.01 - <624.50)                  | 42.56(0.07)              | 69.55(0.46)               | 0.40(0.01)                | 5.16(0.03)                | 0.91(0.01)         | 5.66(0.02)             | 124.28(0.33)                  | 5.10(0.04)                  | 5.54(0.02)        | 30.20(0.18)           | 89.73(0.12)          | 7.39(0.06)                |
| Q4 (>=624.51)                          | 42.84(0.08)              | 68.72(0.47)               | 0.34(0.01)                | 5.09(0.02)                | 0.92(0.00)         | 5.60(0.02)             | 122.99(0.34)                  | 5.06(0.04)                  | 5.60(0.03)        | 30.29(0.16)           | 89.81(0.13)          | 7.15(0.04)                |
| P value                                | 0.163                    | <0.001                    | <0.001                    | 0.002                     | <0.001             | 0.003                  | 0.008                         | 0.064                       | <0.001            | <0.001                | 0.088                | <0.001                    |
| Food natural folate (DFE, mcg/d)       |                          |                           |                           |                           |                    |                        |                               |                             |                   |                       |                      |                           |
| Q1 (<135.00)                           | 41.60(0.10)              | 73.59(0.58)               | 0.51(0.02)                | 5.13(0.03)                | 0.90(0.01)         | 5.68(0.02)             | 125.14(0.40)                  | 4.82(0.04)                  | 5.37(0.03)        | 30.35(0.20)           | 89.26(0.14)          | 7.53(0.05)                |
| Q2 (135.01 - <188.00)                  | 42.14(0.07)              | 70.66(0.40)               | 0.46(0.01)                | 5.15(0.02)                | 0.91(0.01)         | 5.70(0.02)             | 124.31(0.31)                  | 5.14(0.04)                  | 5.48(0.02)        | 29.74(0.16)           | 89.72(0.13)          | 7.46(0.05)                |
| Q3 (188.01 - <258.50)                  | 42.67(0.08)              | 69.26(0.43)               | 0.39(0.01)                | 5.20(0.02)                | 0.90(0.00)         | 5.63(0.01)             | 123.73(0.32)                  | 5.03(0.04)                  | 5.53(0.03)        | 30.22(0.18)           | 89.86(1.28)          | 7.29(0.06)                |
| Q4 (>=258.51)                          | 43.00(0.08)              | 67.61(0.56)               | 0.32(0.01)                | 5.14(0.03)                | 0.90(0.00)         | 5.61(0.02)             | 123.44(0.32)                  | 5.12(0.04)                  | 5.61(0.03)        | 30.42(0.17)           | 90.09(0.13)          | 7.04(0.05)                |
| P value                                | <0.001                   | <0.001                    | <0.001                    | 0.298                     | <0.001             | 0.011                  | 0.016                         | <0.001                      | 0.002             | <0.001                | 0.004                | <0.001                    |
| Food synthetic folic acid (DFE, mcg/d) |                          |                           |                           |                           |                    |                        |                               |                             |                   |                       |                      |                           |

|                                         |             |             |            |            |            |            |              |            |            |             |             |            |
|-----------------------------------------|-------------|-------------|------------|------------|------------|------------|--------------|------------|------------|-------------|-------------|------------|
| Q1<br>(≤81.00)                          | 42.27(0.10) | 70.45(0.46) | 0.45(0.02) | 5.23(0.02) | 0.88(0.01) | 5.67(0.02) | 124.40(0.33) | 5.06(0.05) | 5.42(0.03) | 30.13(0.17) | 90.01(0.14) | 7.31(0.05) |
| Q2<br>(81.01- <137.50)                  | 42.18(0.08) | 70.47(0.52) | 0.43(0.01) | 5.19(0.03) | 0.89(0.01) | 5.67(0.02) | 124.25(0.28) | 5.01(0.04) | 5.48(0.03) | 30.22(0.17) | 89.75(0.14) | 7.33(0.05) |
| Q3<br>(137.51 - <224.50)                | 42.36(0.07) | 70.37(0.44) | 0.43(0.02) | 5.11(0.02) | 0.91(0.01) | 5.67(0.02) | 124.70(0.35) | 5.02(0.04) | 5.55(0.03) | 30.20(0.15) | 89.57(0.12) | 7.40(0.06) |
| Q4<br>(≥224.51)                         | 42.72(0.08) | 69.25(0.46) | 0.35(0.01) | 5.11(0.02) | 0.92(0.00) | 5.61(0.02) | 123.17(0.35) | 5.06(0.04) | 5.56(0.03) | 30.19(0.16) | 89.71(0.13) | 7.23(0.05) |
| P value                                 | 0.136       | 0.52        | 0.001      | <0.001     | 0.785      | 0.054      | 0.001        | 0.068      | <0.001     | 0.018       | <0.001      | 0.015      |
| Serum total folate<br>(mmol/l)          |             |             |            |            |            |            |              |            |            |             |             |            |
| Q1<br>(≤11.07)                          | 42.09(0.08) | 70.68(0.54) | 0.47(0.02) | 5.31(0.02) | 0.93(0.01) | 5.58(0.02) | 123.52(0.32) | 4.55(0.04) | 5.67(0.03) | 30.05(0.18) | 89.86(0.14) | 7.55(0.04) |
| Q2<br>(11.07-19.0))                     | 42.47(0.08) | 68.59(0.44) | 0.43(0.02) | 5.23(0.03) | 0.90(0.01) | 5.61(0.02) | 123.60(0.35) | 4.78(0.04) | 5.49(0.02) | 30.23(0.16) | 89.82(0.16) | 7.27(0.05) |
| Q3<br>(19.01-32.00)                     | 42.53(0.10) | 69.13(0.52) | 0.40(0.02) | 5.13(0.02) | 0.89(0.01) | 5.66(0.02) | 124.48(0.41) | 5.10(0.04) | 5.45(0.03) | 30.14(0.20) | 89.54(0.13) | 7.22(0.05) |
| Q4<br>(≥32.01)                          | 42.84(0.10) | 68.67(0.55) | 0.36(0.01) | 5.03(0.03) | 0.88(0.01) | 5.71(0.03) | 124.06(0.36) | 5.44(0.06) | 5.35(0.04) | 30.12(0.20) | 89.86(0.15) | 7.28(0.07) |
| P value                                 | <0.001      | 0.001       | <0.001     | <0.001     | <0.001     | 0.001      | 0.049        | <0.001     | <0.001     | 0.021       | 0.005       | 0.001      |
| Dietary folate co-<br>exposure patterns |             |             |            |            |            |            |              |            |            |             |             |            |
| Cluster 1                               | 42.21(0.07) | 70.92(0.37) | 0.45(0.01) | 5.20(0.02) | 0.90(0.00) | 5.66(0.01) | 124.29(0.23) | 4.93(0.03) | 5.49(0.02) | 30.20(0.12) | 89.68(0.10) | 7.40(0.03) |
| Cluster 2                               | 42.91(0.08) | 68.98(0.61) | 0.34(0.01) | 5.13(0.02) | 0.93(0.01) | 5.58(0.02) | 123.04(0.36) | 4.99(0.04) | 5.63(0.03) | 30.36(0.19) | 89.65(0.14) | 7.22(0.07) |
| Cluster 3                               | 42.47(0.10) | 68.71(0.56) | 0.37(0.02) | 5.05(0.03) | 0.89(0.01) | 5.70(0.02) | 124.95(0.54) | 5.44(0.06) | 5.43(0.04) | 29.87(0.20) | 90.09(0.17) | 7.12(0.07) |
| Cluster 4                               | 42.50(0.22) | 67.90(1.18) | 0.37(0.03) | 5.09(0.06) | 0.90(0.02) | 5.64(0.04) | 122.75(1.07) | 5.45(0.11) | 5.31(0.07) | 30.34(0.43) | 90.19(0.30) | 7.18(0.09) |
| P value                                 | 0.023       | 0.001       | <0.001     | <0.001     | <0.001     | 0.001      | 0.014        | <0.001     | <0.001     | 0.016       | 0.131       | <0.001     |

a Continuous variables are presented as mean and standard deviation. Categorical variables are presented as percentages.

b Q, quartile; N, number.

c P value for difference after the Bonferroni correction for each variable among four groups according to quartiles of folate intake.

Supplementary Table 4 The association of the intake of folate from diverse sources and the level of several serum folate forms with PA.

|                                  | <sup>b</sup> Case/N | PA                      |                       |                       |                       |
|----------------------------------|---------------------|-------------------------|-----------------------|-----------------------|-----------------------|
|                                  |                     | <sup>d</sup> OR (95%CI) | Model 2<br>OR (95%CI) | Model 3<br>OR (95%CI) | Model 4<br>OR (95%CI) |
| Total folate (DFE, mcg/d)        |                     |                         |                       |                       |                       |
| <sup>b</sup> Q1(≤347.00)         | 2172/4728           | <sup>a</sup> Ref        | Ref                   | Ref                   | Ref                   |
| Q2(347.01 - <521.01)             | 2071/4720           | 0.87(0.78,0.96)         | 0.92(0.83,1.02)       | 0.94(0.83,1.06)       | 0.99(0.87,1.12)       |
| Q3(521.01 - <853.00)             | 1994/4727           | 0.73(0.67,0.80)         | 0.81(0.74,0.88)       | 0.83(0.74,0.93)       | 0.88(0.78,1.00)       |
| Q4(≥853.01)                      | 1784/4714           | 0.57(0.51,0.63)         | 0.68(0.61,0.75)       | 0.70(0.61,0.81)       | 0.75(0.64,0.88)       |
| P trend                          |                     | <0.001                  | <0.001                | <0.001                | <0.001                |
| Dietary folate (DFE, mcg/d)      |                     |                         |                       |                       |                       |
| Q1(<316.00)                      | 1977/4744           | Ref                     | Ref                   | Ref                   | Ref                   |
| Q2(316.51 - <444.00)             | 1998/4703           | 0.84(0.75,0.95)         | 0.89(0.79,1.00)       | 0.90(0.79,1.01)       | 0.92(0.81,1.05)       |
| Q3(444.01 - <624.50)             | 2104/4738           | 0.78(0.71,0.86)         | 0.85(0.77,0.94)       | 0.86(0.77,0.97)       | 0.89(0.79,1.00)       |
| Q4(≥624.51)                      | 1942/4704           | 0.63(0.57,0.70)         | 0.71(0.64,0.78)       | 0.73(0.65,0.82)       | 0.79(0.70,0.90)       |
| P trend                          |                     | <0.001                  | <0.001                | <0.001                | <0.001                |
| Natural food folate (DFE, mcg/d) |                     |                         |                       |                       |                       |
| Q1(<135.00)                      | 2084/4732           | Ref                     | Ref                   | Ref                   | Ref                   |
| Q2(135.01 - <188.00)             | 2108/4727           | 0.81(0.72,0.90)         | 0.87(0.78,0.98)       | 0.89(0.80,1.00)       | 0.87(0.77,0.99)       |
| Q3(188.01- <258.50)              | 2018/4708           | 0.61(0.54,0.69)         | 0.69(0.61,0.79)       | 0.72(0.63,0.83)       | 0.72(0.63,0.84)       |
| Q4(≥258.51)                      | 1811/4722           | 0.53(0.47,0.59)         | 0.63(0.56,0.70)       | 0.67(0.59,0.76)       | 0.65(0.57,0.75)       |
| P trend                          |                     | <0.001                  | <0.001                | <0.001                | <0.001                |

Synthetic folic acid (DFE, mcg/d)

|                      |           |                 |                 |                 |                 |
|----------------------|-----------|-----------------|-----------------|-----------------|-----------------|
| Q1(<81.00)           | 2097/4730 | Ref             | Ref             | Ref             | Ref             |
| Q2(81.01- <137.50)   | 2029/4722 | 1.00(0.90,1.10) | 1.00(0.90,1.10) | 0.97(0.87,1.07) | 0.98(0.87,1.10) |
| Q3(137.51 - <224.50) | 1974/4719 | 1.09(0.97,1.23) | 1.10(0.97,1.25) | 1.08(0.94,1.24) | 1.12(0.97,1.31) |
| Q4( $\geq$ 224.51)   | 1921/4718 | 0.83(0.75,0.92) | 0.86(0.78,0.95) | 0.86(0.77,0.96) | 0.94(0.82,1.07) |
| P trend              |           | 0.002           | 0.021           | 0.046           | 0.669           |

Folic acid supplement taken

|         |            |                 |                 |                 |                 |
|---------|------------|-----------------|-----------------|-----------------|-----------------|
| No      | 6453/14561 | Ref             | Ref             | Ref             | Ref             |
| Yes     | 1568/4328  | 0.62(0.53,0.71) | 0.68(0.58,0.80) | 0.70(0.60,0.83) | 0.67(0.56,0.80) |
| P value |            | <0.001          | <0.001          | <0.001          | <0.001          |

Serum total folate (mmol/l)

|                   |           |                 |                 |                 |                 |
|-------------------|-----------|-----------------|-----------------|-----------------|-----------------|
| Q1( $\leq$ 11.07) | 2191/4296 | Ref             | Ref             | Ref             | Ref             |
| Q2(11.07-19.0))   | 1777/4405 | 0.65(0.58,0.72) | 0.67(0.60,0.76) | 0.78(0.67,0.90) | 0.67(0.60,0.76) |
| Q3(19.01-32.00)   | 1700/4354 | 0.59(0.52,0.66) | 0.58(0.51,0.66) | 0.81(0.67,0.96) | 0.58(0.51,0.67) |
| Q4( $\geq$ 32.01) | 1578/4343 | 0.51(0.45,0.59) | 0.46(0.40,0.54) | 0.63(0.51,0.78) | 0.49(0.41,0.58) |
| P trend           |           | <0.001          | <0.001          | <0.001          | <0.001          |

Serum 5-mTHF (nmol/L)

|                   |          |                 |                 |                 |                 |
|-------------------|----------|-----------------|-----------------|-----------------|-----------------|
| Q1( $\leq$ 22,70) | 708/1446 | Ref             | Ref             | Ref             | Ref             |
| Q2(22.71-33.10)   | 577/1439 | 0.70(0.56,0.87) | 0.74(0.59,0.93) | 0.74(0.59,0.94) | 0.70(0.56,0.87) |
| Q3(33.11-48.85)   | 522/1426 | 0.56(0.44,0.72) | 0.62(0.48,0.80) | 0.64(0.49,0.84) | 0.67(0.49,0.92) |
| Q4( $\geq$ 48.86) | 474/1437 | 0.44(0.33,0.59) | 0.49(0.38,0.65) | 0.52(0.39,0.69) | 0.51(0.38,0.70) |
| P trend           |          | <0.001          | <0.001          | <0.001          | <0.001          |

Serum UMFA (nmol/L)



|                                        |          |                 |                 |                 |                 |
|----------------------------------------|----------|-----------------|-----------------|-----------------|-----------------|
| Q1( $\leq 0.46$ )                      | 544/1472 | Ref             | Ref             | Ref             | Ref             |
| Q2(0.46-0.62)                          | 533/1409 | 1.08(0.85,1.35) | 1.05(0.84,1.32) | 1.05(0.84,1.30) | 1.13(0.89,1.44) |
| Q3(0.63-0.94)                          | 592/1431 | 1.17(0.98,1.39) | 1.13(0.95,1.35) | 1.14(0.95,1.37) | 1.32(1.06,1.64) |
| Q4( $\geq 0.94$ )                      | 612/1436 | 1.05(0.83,1.33) | 1.03(0.82,1.29) | 1.12(0.88,1.42) | 1.29(0.93,1.78) |
| P trend                                |          | 0.502           | 0.655           | 0.272           | 0.064           |
| Serum non-methylated folate (nmol/L)   |          |                 |                 |                 |                 |
| Q1( $\leq 0.83$ )                      | 516/1416 | Ref             | Ref             | Ref             | Ref             |
| Q2(0.84-1.05)                          | 538/1458 | 1.10(0.90,1.33) | 1.16(0.93,1.43) | 1.17(0.94,1.47) | 1.17(0.92,1.49) |
| Q3(1.06-1.35)                          | 590/1437 | 1.16(0.93,1.44) | 1.27(1.05,1.55) | 1.34(1.11,1.62) | 1.45(1.18,1.77) |
| Q4( $\geq 1.36$ )                      | 637/1437 | 1.16(0.92,1.47) | 1.31(1.05,1.63) | 1.48(1.16,1.88) | 1.76(1.31,2.38) |
| P trend                                |          | 0.168           | 0.008           | <0.001          | <0.001          |
| Serum Mefox oxidation product (nmol/L) |          |                 |                 |                 |                 |
| Q1( $\leq 0.83$ )                      | 407/1453 | Ref             | Ref             | Ref             | Ref             |
| Q2(0.84-1.35)                          | 493/1422 | 1.34(0.99,1.80) | 1.40(1.06,1.86) | 1.39(1.06,1.84) | 1.37(1.06,1.77) |
| Q3(1.36-2.33)                          | 618/1441 | 1.87(1.47,2.39) | 2.01(1.57,2.59) | 2.09(1.64,2.66) | 2.03(1.55,2.67) |
| Q4( $\geq 2.34$ )                      | 763/1432 | 2.79(2.09,3.74) | 2.93(2.18,3.93) | 3.07(2.31,4.07) | 3.10(2.28,4.22) |
| P trend                                |          | <0.001          | <0.001          | <0.001          | <0.001          |

a Ref indicated the reference group.

b Case/N, the number of case subjects/total.

c Q, quartile.

d Data were listed as odds risk and 95% confidence intervals.

e Adjustments included age, sex, race/ethnicity, PIR, education level, physical activity level, drinking, smoking, BMI, disease history of diabetes, disease history of hypertension, disease history of dyslipidemia, disease history of cardiovascular disease, energy, vitamin B12, and diet quality.

Supplementary Table 5 The association of the intake of folate from diverse sources and the level of several serum folate forms with KDM.

|                                  | <sup>b</sup> Case/N | KDM                                |                       |                       |                       |
|----------------------------------|---------------------|------------------------------------|-----------------------|-----------------------|-----------------------|
|                                  |                     | Model 1<br><sup>d</sup> OR (95%CI) | Model 2<br>OR (95%CI) | Model 3<br>OR (95%CI) | Model 4<br>OR (95%CI) |
| Total folate (DFE, mcg/d)        |                     |                                    |                       |                       |                       |
| <sup>b</sup> Q1(≤347.00)         | 930/4728            | <sup>a</sup> Ref                   | Ref                   | Ref                   | Ref                   |
| Q2(347.01 - <521.01)             | 789/4720            | 0.80(0.69,0.93)                    | 0.87(0.75,1.01)       | 0.88(0.76,1.02)       | 0.93(0.80,1.07)       |
| Q3(521.01 - <853.00)             | 715/4727            | 0.75(0.65,0.88)                    | 0.84(0.72,0.98)       | 0.85(0.72,1.01)       | 0.90(0.76,1.07)       |
| Q4(≥853.01)                      | 538/4714            | 0.52(0.45,0.60)                    | 0.60(0.52,0.69)       | 0.62(0.53,0.73)       | 0.63(0.53,0.75)       |
| P trend                          |                     | <0.001                             | <0.001                | <0.001                | <0.001                |
| Dietary folate (DFE, mcg/d)      |                     |                                    |                       |                       |                       |
| Q1(<316.00)                      | 777/4744            | Ref                                | Ref                   | Ref                   | Ref                   |
| Q2(316.51 - <444.00)             | 734/4703            | 0.78(0.67,0.92)                    | 0.85(0.73,1.00)       | 0.85(0.72,1.01)       | 0.90(0.75,1.07)       |
| Q3(444.01 - <624.50)             | 795/4738            | 0.75(0.64,0.88)                    | 0.84(0.71,0.98)       | 0.84(0.70,1.02)       | 0.88(0.73,1.06)       |
| Q4(≥624.51)                      | 666/4704            | 0.62(0.53,0.73)                    | 0.71(0.60,0.84)       | 0.72(0.60,0.88)       | 0.80(0.65,0.98)       |
| P trend                          |                     | <0.001                             | <0.001                | 0.002                 | 0.035                 |
| Natural food folate (DFE, mcg/d) |                     |                                    |                       |                       |                       |
| Q1(<135.00)                      | 845/4732            | Ref                                | Ref                   | Ref                   | Ref                   |
| Q2(135.01 - <188.00)             | 833/4727            | 0.84(0.73,0.96)                    | 0.92(0.80,1.06)       | 0.93(0.80,1.08)       | 0.91(0.78,1.06)       |
| Q3(188.01- <258.50)              | 738/4708            | 0.63(0.54,0.73)                    | 0.73(0.63,0.84)       | 0.75(0.63,0.89)       | 0.74(0.62,0.89)       |
| Q4(≥258.51)                      | 556/4722            | 0.51(0.43,0.61)                    | 0.61(0.51,0.73)       | 0.64(0.53,0.79)       | 0.62(0.49,0.77)       |
| P trend                          |                     | <0.001                             | <0.001                | <0.001                | <0.001                |

|                                   |            |                 |                 |                 |                 |
|-----------------------------------|------------|-----------------|-----------------|-----------------|-----------------|
| Synthetic folic acid (DFE, mcg/d) |            |                 |                 |                 |                 |
| Q1(<81.00)                        | 881/4730   | Ref             | Ref             | Ref             | Ref             |
| Q2(81.01- <137.50)                | 766/4722   | 0.99(0.83,1.18) | 1.01(0.85,1.21) | 0.93(0.83,1.19) | 1.02(0.83,1.25) |
| Q3(137.51 - <224.50)              | 685/4719   | 1.07(0.90,1.28) | 1.10(0.92,1.31) | 1.08(0.90,1.31) | 1.13(0.92,1.38) |
| Q4( $\geq$ 224.51)                | 640/4718   | 0.87(0.75,1.02) | 0.92(0.79,1.08) | 0.93(0.78,1.10) | 1.03(0.85,1.25) |
| P trend                           |            | 0.174           | 0.512           | 0.606           | 0.556           |
| Folic acid supplement taken       |            |                 |                 |                 |                 |
| No                                | 2495/14561 | Ref             | Ref             | Ref             | Ref             |
| Yes                               | 477/4328   | 0.81(0.72,0.90) | 0.91(0.82,1.02) | 0.94(0.84,1.05) | 0.86(0.77,0.96) |
| P value                           |            | <0.001          | 0.115           | 0.278           | 0.009           |
| Serum total folate (mmol/l)       |            |                 |                 |                 |                 |
| Q1( $\leq$ 11.07)                 | 889/4296   | Ref             | Ref             | Ref             | Ref             |
| Q2(11.07-19.0))                   | 658/4405   | 0.73(0.64,0.84) | 0.75(0.65,0.86) | 0.70(0.62,0.79) | 0.76(0.65,0.89) |
| Q3(19.01-32.00)                   | 633/4354   | 0.79(0.67,0.92) | 0.73(0.61,0.87) | 0.62(0.54,0.70) | 0.77(0.64,0.93) |
| Q4( $\geq$ 32.01)                 | 513/4343   | 0.62(0.52,0.73) | 0.52(0.42,0.63) | 0.52(0.45,0.60) | 0.60(0.48,0.74) |
| P trend                           |            | <0.001          | <0.001          | 0.030           | <0.001          |
| Serum 5-mTHF (nmol/L)             |            |                 |                 |                 |                 |
| Q1( $\leq$ 22,70)                 |            | Ref             | Ref             | Ref             | Ref             |
| Q2(22.71-33.10)                   | 316/1446   | 0.70(0.56,0.87) | 0.98(0.73,1.31) | 1.00(0.74,1.34) | 0.98(0.74,1.30) |
| Q3(33.11-48.85)                   | 271/1439   | 0.56(0.44,0.72) | 0.73(0.55,0.98) | 0.79(0.59,1.06) | 0.83(0.62,1.11) |
| Q4( $\geq$ 48.86)                 | 209/1426   | 0.44(0.33,0.59) | 0.43(0.30,0.62) | 0.49(0.35,0.70) | 0.49(0.34,0.71) |
| P trend                           | 139/1437   | <0.001          | <0.001          | <0.001          | <0.001          |
| Serum UMFA (nmol/L)               |            |                 |                 |                 |                 |

|                                        |           |                 |                 |                 |                 |
|----------------------------------------|-----------|-----------------|-----------------|-----------------|-----------------|
| Q1( $\leq 0.46$ )                      | 254/1472  | Ref             | Ref             | Ref             | Ref             |
| Q2(0.46-0.62)                          | 230/1409  | 1.02(0.78,1.33) | 1.01(0.76,1.35) | 1.02(0.77,1.35) | 1.06(0.80,1.40) |
| Q3(0.63-0.94)                          | 228/1431  | 0.94(0.75,1.17) | 0.93(0.74,1.17) | 0.96(0.76,1.22) | 1.02(0.76,1.38) |
| Q4( $\geq 0.94$ )                      | 223/1436  | 0.87(0.62,1.22) | 0.89(0.62,1.26) | 1.02(0.71,1.45) | 1.18(0.75,1.85) |
| P trend                                |           | 0.306           | 0.393           | 0.972           | 0.531           |
| Serum non-methylated folate (nmol/L)   |           |                 |                 |                 |                 |
| Q1( $\leq 0.83$ )                      | 222/1416  | Ref             | Ref             | Ref             | Ref             |
| Q2(0.84-1.05)                          | 232/1458  | 1.19(0.84,1.69) | 1.28(0.89,1.84) | 1.32(0.91,1.92) | 1.31(0.89,1.93) |
| Q3(1.06-1.35)                          | 254/1437  | 1.44(1.05,1.98) | 1.62(1.17,2.24) | 1.80(1.28,2.53) | 1.95(1.35,2.81) |
| Q4( $\geq 1.36$ )                      | 227/1437  | 1.08(0.83,1.41) | 1.28(0.98,1.66) | 1.53(1.17,1.99) | 1.92(1.38,2.68) |
| P trend                                |           | 0.278           | 0.02            | <0.001          | <0.001          |
| Serum Mefox oxidation product (nmol/L) |           |                 |                 |                 |                 |
| Q1( $\leq 0.83$ )                      | 196/1453  | Ref             | Ref             | Ref             | Ref             |
| Q2(0.84-1.35)                          | 207/1422  | 1.11(0.71,1.73) | 1.18(0.76,1.83) | 1.19(0.77,1.84) | 1.12(0.71,1.77) |
| Q3(1.36-2.33)                          | 229/1441  | 1.22(0.82,1.82) | 1.35(0.91,2.01) | 1.41(0.94,2.10) | 1.28(0.85,1.92) |
| Q4( $\geq 2.34$ )                      | 1432/1432 | 2.07(1.51,2.82) | 2.25(1.65,3.06) | 2.39(1.76,3.24) | 2.19(1.61,2.99) |
| P trend                                |           | <0.001          | <0.001          | <0.001          | <0.001          |

a Ref indicated the reference group.

b Case/N, the number of case subjects/total.

c Q, quartile.

d Data were listed as odds risk and 95% confidence intervals.

e Adjustments included age, sex, race/ethnicity, PIR, education level, physical activity level, drinking, smoking, BMI, disease history of diabetes, disease history of hypertension, disease history of dyslipidemia, disease history of cardiovascular disease, energy, vitamin B12, and diet quality.

Supplementary Table 6 The association of the intake of folate from diverse sources and the level of several serum folate forms with HD.

|                                  | <sup>b</sup> Case/N | HD                      |                 |                 |                 |
|----------------------------------|---------------------|-------------------------|-----------------|-----------------|-----------------|
|                                  |                     | <sup>d</sup> OR (95%CI) | OR (95%CI)      | OR (95%CI)      | OR (95%CI)      |
| Total folate (DFE, mcg/d)        |                     |                         |                 |                 |                 |
| <sup>b</sup> Q1(≤347.00)         | 2708/4728           | <sup>a</sup> Ref        | Ref             | Ref             | Ref             |
| Q2(347.01 - <521.01)             | 2369/4720           | 0.77(0.70,0.86)         | 0.81(0.73,0.91) | 0.81(0.73,0.91) | 0.86(0.76,0.97) |
| Q3(521.01 - <853.00)             | 2213/4727           | 0.75(0.68,0.83)         | 0.81(0.72,0.90) | 0.80(0.70,0.91) | 0.85(0.73,0.99) |
| Q4(≥853.01)                      | 2154/4714           | 0.63(0.55,0.72)         | 0.72(0.63,0.83) | 0.69(0.58,0.82) | 0.69(0.56,0.84) |
| P trend                          |                     | <0.001                  | <0.001          | <0.001          | 0.001           |
| Dietary folate (DFE, mcg/d)      |                     |                         |                 |                 |                 |
| Q1(<316.00)                      | 2551/4744           | Ref                     | Ref             | Ref             | Ref             |
| Q2(316.51 - <444.00)             | 2442/4703           | 0.78(0.70,0.88)         | 0.81(0.72,0.91) | 0.81(0.72,0.91) | 0.83(0.73,0.95) |
| Q3(444.01 - <624.50)             | 2334/4738           | 0.80(0.71,0.90)         | 0.84(0.75,0.95) | 0.84(0.74,0.96) | 0.87(0.75,1.00) |
| Q4(≥624.51)                      | 2117/4704           | 0.67(0.60,0.76)         | 0.73(0.64,0.82) | 0.73(0.64,0.83) | 0.78(0.67,0.92) |
| P trend                          |                     | <0.001                  | <0.001          | <0.001          | 0.011           |
| Natural food folate (DFE, mcg/d) |                     |                         |                 |                 |                 |
| Q1(<135.00)                      | 2625/4732           | Ref                     | Ref             | Ref             | Ref             |
| Q2(135.01 - <188.00)             | 2409/4727           | 0.88(0.79,0.97)         | 0.93(0.84,1.03) | 0.94(0.84,1.05) | 0.90(0.79,1.03) |
| Q3(188.01- <258.50)              | 2210/4708           | 0.75(0.67,0.84)         | 0.84(0.74,0.94) | 0.85(0.75,0.96) | 0.86(0.75,0.99) |
| Q4(≥258.51)                      | 2200/4722           | 0.68(0.61,0.76)         | 0.80(0.71,0.90) | 0.81(0.71,0.92) | 0.78(0.68,0.90) |
| P trend                          |                     | <0.001                  | <0.001          | <0.001          | <0.001          |

Synthetic folic acid (DFE, mcg/d)

|                      |           |                 |                 |                 |                 |
|----------------------|-----------|-----------------|-----------------|-----------------|-----------------|
| Q1(<81.00)           | 2667/4730 | Ref             | Ref             | Ref             | Ref             |
| Q2(81.01- <137.50)   | 2413/4722 | 0.97(0.87,1.08) | 0.96(0.85,1.07) | 0.95(0.85,1.07) | 0.99(0.87,1.13) |
| Q3(137.51 - <224.50) | 2303/4719 | 0.90(0.80,1.01) | 0.88(0.78,0.99) | 0.88(0.78,0.99) | 0.89(0.77,1.03) |
| Q4( $\geq$ 224.51)   | 2061/4718 | 0.81(0.72,0.90) | 0.81(0.72,0.91) | 0.82(0.72,0.93) | 0.89(0.77,1.04) |
| P trend              |           | <0.001          | <0.001          | <0.001          | 0.065           |

Folic acid supplement taken

|         |            |                 |                 |                 |                 |
|---------|------------|-----------------|-----------------|-----------------|-----------------|
| No      | 7398/14561 | Ref             | Ref             | Ref             | Ref             |
| Yes     | 2046/4328  | 0.70(0.63,0.76) | 0.81(0.74,0.89) | 0.85(0.77,0.94) | 0.84(0.75,0.93) |
| P value |            | <0.001          | <0.001          | 0.002           | 0.002           |

Serum total folate (mmol/l)

|                   |           |                 |                 |                 |                 |
|-------------------|-----------|-----------------|-----------------|-----------------|-----------------|
| Q1( $\leq$ 11.07) | 2243/4296 | Ref             | Ref             | Ref             | Ref             |
| Q2(11.07-19.0))   | 2156/4405 | 0.81(0.73,0.90) | 0.89(0.79,0.99) | 0.90(0.80,1.00) | 0.85(0.76,0.95) |
| Q3(19.01-32.00)   | 2156/4354 | 0.83(0.74,0.93) | 0.96(0.85,1.10) | 1.00(0.87,1.13) | 0.93(0.81,1.07) |
| Q4( $\geq$ 32.01) | 2144/4343 | 0.68(0.59,0.78) | 0.83(0.70,0.99) | 0.88(0.74,1.05) | 0.74(0.61,0.89) |
| P trend           |           | <0.001          | 0.090           | 0.315           | 0.008           |

Serum 5-mTHF (nmol/L)

|                   |          |                 |                 |                 |                 |
|-------------------|----------|-----------------|-----------------|-----------------|-----------------|
| Q1( $\leq$ 22,70) | 699/1446 | Ref             | Ref             | Ref             | Ref             |
| Q2(22.71-33.10)   | 644/1439 | 0.94(0.74,1.20) | 0.86(0.69,1.07) | 0.86(0.69,1.07) | 0.76(0.58,0.99) |
| Q3(33.11-48.85)   | 644/1426 | 0.89(0.73,1.08) | 0.77(0.56,1.07) | 0.78(0.57,1.06) | 0.76(0.54,1.06) |
| Q4( $\geq$ 48.86) | 684/1437 | 1.04(0.82,1.31) | 0.75(0.56,0.99) | 0.75(0.57,0.99) | 0.66(0.48,0.89) |
| P trend           |          | 0.027           | 0.058           | 0.053           | 0.021           |

Serum UMFA (nmol/L)



|                                        |          |                 |                 |                 |                 |
|----------------------------------------|----------|-----------------|-----------------|-----------------|-----------------|
| Q1( $\leq$ 0.46)                       | 627/1472 | Ref             | Ref             | Ref             | Ref             |
| Q2(0.46-0.62)                          | 05/1409  | 0.94(0.74,1.21) | 0.94(0.73,1.20) | 0.94(0.74,1.20) | 1.00(0.77,1.31) |
| Q3(0.63-0.94)                          | 698/1431 | 0.90(0.74,1.09) | 0.88(0.73,1.06) | 0.89(0.73,1.08) | 0.95(0.76,1.19) |
| Q4( $\geq$ 0.94)                       | 741/1436 | 1.04(0.81,1.35) | 1.00(0.78,1.29) | 1.04(0.82,1.31) | 1.00(0.78,1.29) |
| P trend                                |          | 0.832           | 0.867           | 0.887           | 0.878           |
| Serum non-methylated folate (nmol/L)   |          |                 |                 |                 |                 |
| Q1( $\leq$ 0.83)                       | 545/1416 | Ref             | Ref             | Ref             | Ref             |
| Q2(0.84-1.05)                          | 594/1458 | 1.04(0.82,1.32) | 1.01(0.79,1.28) | 1.02(0.80,1.29) | 0.95(0.71,1.27) |
| Q3(1.06-1.35)                          | 725/1437 | 1.33(1.05,1.69) | 1.30(1.02,1.65) | 1.35(1.07,1.70) | 1.43(1.10,1.85) |
| Q4( $\geq$ 1.36)                       | 807/1437 | 1.52(1.21,1.90) | 1.46(1.16,1.83) | 1.57(1.26,1.97) | 1.53(1.14,2.07) |
| P trend                                |          | <0.001          | <0.001          | <0.001          | 0.001           |
| Serum Mefox oxidation product (nmol/L) |          |                 |                 |                 |                 |
| Q1( $\leq$ 0.83)                       | 580/1453 | Ref             | Ref             | Ref             | Ref             |
| Q2(0.84-1.35)                          | 581/1422 | 1.22(0.93,1.62) | 1.22(0.93,1.60) | 1.23(0.93,1.61) | 1.10(0.85,1.42) |
| Q3(1.36-2.33)                          | 691/1441 | 1.49(1.16,1.93) | 1.47(1.14,1.89) | 1.49(1.16,1.91) | 1.22(0.93,1.60) |
| Q4( $\geq$ 2.34)                       | 819/1432 | 2.00(1.53,2.62) | 1.88(1.43,2.48) | 1.92(1.46,2.52) | 1.56(1.12,2.17) |
| P trend                                |          | <0.001          | <0.001          | <0.001          | 0.007           |

a Ref indicated the reference group.

b Case/N, the number of case subjects/total.

c Q, quartile.

d Data were listed as odds risk and 95% confidence intervals.

e Adjustments included age, sex, race/ethnicity, PIR, education level, physical activity level, drinking, smoking, BMI, disease history of diabetes, disease history of hypertension, disease history of dyslipidemia, disease history of cardiovascular disease, energy, vitamin B12, and diet quality.

Supplementary Table 7 The association of the intake of folate from diverse sources and the level of several serum folate forms with AL.

|                                  | AL                  |                                    |                       |                       |                       |
|----------------------------------|---------------------|------------------------------------|-----------------------|-----------------------|-----------------------|
|                                  | <sup>b</sup> Case/N | Model 1<br><sup>d</sup> OR (95%CI) | Model 2<br>OR (95%CI) | Model 3<br>OR (95%CI) | Model 4<br>OR (95%CI) |
| Total folate (DFE, mcg/d)        |                     |                                    |                       |                       |                       |
| <sup>b</sup> Q1(≤347.00)         | 1774/4728           | <sup>a</sup> Ref                   | Ref                   | Ref                   | Ref                   |
| Q2(347.01 - <521.01)             | 1546/4720           | 0.86(0.77,0.97)                    | 0.91(0.81,1.02)       | 0.89(0.79,1.01)       | 0.95(0.83,1.07)       |
| Q3(521.01 - <853.00)             | 1404/4727           | 0.79(0.68,0.90)                    | 0.86(0.75,0.99)       | 0.82(0.71,0.95)       | 0.88(0.76,1.02)       |
| Q4(≥853.01)                      | 1397/4714           | 0.63(0.56,0.72)                    | 0.73(0.65,0.84)       | 0.67(0.57,0.79)       | 0.69(0.58,0.82)       |
| P trend                          |                     | <0.001                             | <0.001                | <0.001                | <0.001                |
| Dietary folate (DFE, mcg/d)      |                     |                                    |                       |                       |                       |
| Q1(<316.00)                      | 1661/4744           | Ref                                | Ref                   | Ref                   | Ref                   |
| Q2(316.51 - <444.00)             | 1546/4703           | 0.79(0.71,0.88)                    | 0.82(0.74,0.92)       | 0.81(0.71,0.91)       | 0.83(0.73,0.95)       |
| Q3(444.01 - <624.50)             | 1542/4738           | 0.83(0.73,0.95)                    | 0.90(0.79,1.03)       | 0.87(0.75,1.00)       | 0.89(0.77,1.04)       |
| Q4(≥624.51)                      | 1354/4704           | 0.63(0.55,0.71)                    | 0.70(0.62,0.80)       | 0.67(0.58,0.78)       | 0.73(0.63,0.85)       |
| P trend                          |                     | <0.001                             | <0.001                | <0.001                | <0.001                |
| Natural food folate (DFE, mcg/d) |                     |                                    |                       |                       |                       |
| Q1(<135.00)                      | 1712/4732           | Ref                                | Ref                   | Ref                   | Ref                   |
| Q2(135.01 - <188.00)             | 1542/4727           | 0.85(0.76,0.95)                    | 0.92(0.82,1.03)       | 0.91(0.81,1.03)       | 0.89(0.79,1.01)       |
| Q3(188.01- <258.50)              | 1437/4708           | 0.73(0.64,0.84)                    | 0.84(0.73,0.96)       | 0.83(0.72,0.96)       | 0.86(0.74,0.99)       |
| Q4(≥258.51)                      | 1412/4722           | 0.62(0.54,0.72)                    | 0.75(0.65,0.87)       | 0.75(0.63,0.89)       | 0.74(0.62,0.90)       |
| P trend                          |                     | <0.001                             | <0.001                | <0.001                | 0.002                 |

|                                   |            |                 |                 |                 |                 |
|-----------------------------------|------------|-----------------|-----------------|-----------------|-----------------|
| Synthetic folic acid (DFE, mcg/d) |            |                 |                 |                 |                 |
| Q1(<81.00)                        | 1768/4730  | Ref             | Ref             | Ref             | Ref             |
| Q2(81.01- <137.50)                | 1545/4722  | 0.96(0.85,1.09) | 0.96(0.84,1.09) | 0.93(0.82,1.05) | 0.95(0.83,1.09) |
| Q3(137.51 - <224.50)              | 1509/4719  | 1.00(0.88,1.13) | 1.00(0.89,1.14) | 0.97(0.85,1.10) | 0.99(0.87,1.13) |
| Q4( $\geq$ 224.51)                | 1281/4718  | 0.77(0.67,0.88) | 0.80(0.71,0.91) | 0.77(0.68,0.88) | 0.83(0.73,0.95) |
| P trend                           |            | <0.001          | 0.004           | <0.001          | 0.023           |
| Folic acid supplement taken       |            |                 |                 |                 |                 |
| No                                | 4796/14561 | Ref             | Ref             | Ref             | Ref             |
| Yes                               | 1307/4328  | 0.62(0.53,0.71) | 0.68(0.58,0.80) | 0.70(0.60,0.83) | 0.67(0.56,0.80) |
| P value                           |            | <0.001          | <0.001          | <0.001          | <0.001          |
| Serum total folate (mmol/l)       |            |                 |                 |                 |                 |
| Q1( $\leq$ 11.07)                 | 1490/4296  | Ref             | Ref             | Ref             | Ref             |
| Q2(11.07-19.0))                   | 1326/4405  | 0.73(0.65,0.82) | 0.78(0.69,0.88) | 0.80(0.71,0.90) | 0.77(0.68,0.88) |
| Q3(19.01-32.00)                   | 1327/4354  | 0.72(0.63,0.83) | 0.76(0.66,0.88) | 0.79(0.68,0.92) | 0.76(0.65,0.89) |
| Q4( $\geq$ 32.01)                 | 1331/4343  | 0.66(0.58,0.75) | 0.69(0.57,0.83) | 0.73(0.60,0.90) | 0.67(0.55,0.83) |
| P trend                           |            | <0.001          | <0.001          | 0.030           | <0.001          |
| Serum 5-mTHF (nmol/L)             |            |                 |                 |                 |                 |
| Q1( $\leq$ 22,70)                 | 476/1446   | Ref             | Ref             | Ref             | Ref             |
| Q2(22.71-33.10)                   | 400/1439   | 0.65(0.52,0.82) | 0.69(0.54,0.87) | 0.69(0.54,0.88) | 0.62(0.50,0.78) |
| Q3(33.11-48.85)                   | 376/1426   | 0.59(0.43,0.81) | 0.65(0.47,0.90) | 0.67(0.48,0.94) | 0.67(0.48,0.92) |
| Q4( $\geq$ 48.86)                 | 417/1437   | 0.57(0.41,0.80) | 0.63(0.45,0.88) | 0.66(0.45,0.96) | 0.60(0.40,0.89) |
| P trend                           |            | 0.003           | 0.012           | 0.034           | 0.019           |
| Serum UMFA (nmol/L)               |            |                 |                 |                 |                 |

|                                        |          |                 |                 |                 |                 |
|----------------------------------------|----------|-----------------|-----------------|-----------------|-----------------|
| Q1( $\leq 0.46$ )                      | 362/1472 | Ref             | Ref             | Ref             | Ref             |
| Q2(0.46-0.62)                          | 371/1409 | 1.16(0.90,1.51) | 1.13(0.87,1.47) | 1.12(0.86,1.45) | 1.28(0.95,1.73) |
| Q3(0.63-0.94)                          | 443/1431 | 1.13(0.91,1.41) | 1.07(0.86,1.34) | 1.07(0.84,1.35) | 1.24(0.97,1.59) |
| Q4( $\geq 0.94$ )                      | 493/1436 | 1.05(0.78,1.42) | 1.00(0.75,1.33) | 1.04(0.79,1.38) | 1.05(0.74,1.49) |
| P trend                                |          | 0.814           | 0.894           | 0.896           | 0.797           |
| Serum non-methylated folate (nmol/L)   |          |                 |                 |                 |                 |
| Q1( $\leq 0.83$ )                      | 336/1416 | Ref             | Ref             | Ref             | Ref             |
| Q2(0.84-1.05)                          | 353/1458 | 0.98(0.74,1.30) | 1.02(0.75,1.38) | 1.02(0.75,1.39) | 1.02(0.73,1.42) |
| Q3(1.06-1.35)                          | 424/1437 | 1.20(0.87,1.65) | 1.28(0.91,1.80) | 1.34(0.95,1.89) | 1.47(1.05,2.06) |
| Q4( $\geq 1.36$ )                      | 556/1437 | 1.37(1.04,1.81) | 1.51(1.12,2.03) | 1.68(1.25,2.27) | 1.88(1.31,2.68) |
| P trend                                |          | 0.027           | 0.007           | 0.001           | <0.001          |
| Serum Mefox oxidation product (nmol/L) |          |                 |                 |                 |                 |
| Q1( $\leq 0.83$ )                      | 275/1453 | Ref             | Ref             | Ref             | Ref             |
| Q2(0.84-1.35)                          | 348/1422 | 1.52(1.11,2.07) | 1.59(1.17,2.15) | 1.58(1.18,2.12) | 1.53(1.20,1.95) |
| Q3(1.36-2.33)                          | 441/1441 | 1.59(1.21,2.07) | 1.66(1.28,2.14) | 1.69(1.32,2.18) | 1.49(1.17,1.91) |
| Q4( $\geq 2.34$ )                      | 605/1432 | 2.56(1.85,3.54) | 2.53(1.82,3.50) | 2.58(1.88,3.55) | 2.22(1.64,2.99) |
| P trend                                |          | <0.001          | <0.001          | <0.001          | <0.001          |

a Ref indicated the reference group.

b Case/N, the number of case subjects/total.

c Q, quartile.

d Data were listed as odds risk and 95% confidence intervals.

e Adjustments included age, sex, race/ethnicity, PIR, education level, physical activity level, drinking, smoking, BMI, disease history of diabetes, disease history of hypertension, disease history of dyslipidemia, disease history of cardiovascular disease, energy, vitamin B12, and diet quality.

Supplementary Table 8 The association of the intake of folate from diverse sources with PA and KDM.

|                                  | PA                  |                         |                         |                         |                         | KDM       |                         |                         |                         |                         |
|----------------------------------|---------------------|-------------------------|-------------------------|-------------------------|-------------------------|-----------|-------------------------|-------------------------|-------------------------|-------------------------|
|                                  | <sup>b</sup> Case/N | Model 1                 | Model 2                 | Model 3                 | Model 4                 | Case/N    | Model 1                 | Model 2                 | Model 3                 | Model 4                 |
|                                  |                     | <sup>d</sup> β(95%CI)   | β(95%CI)                | β (95%CI)               | β (95%CI)               |           | β(95%CI)                | β(95%CI)                | β (95%CI)               | β (95%CI)               |
| Total folate (DFE, mcg/d)        |                     |                         |                         |                         |                         |           |                         |                         |                         |                         |
| <sup>c</sup> Q1(<8.44)           | 2172/4728           | <sup>a</sup> Ref        | Ref                     | Ref                     | Ref                     | 2113/4633 | Ref                     | Ref                     | Ref                     | Ref                     |
| Q2(8.45 - <9.03)                 | 2071/4720           | -0.44<br>(-0.67, -0.21) | -0.26<br>(-0.46, -0.05) | -0.19<br>(-0.40, 0.02)  | -0.03<br>(-0.22, 0.16)  | 2035/4624 | -0.52<br>(-0.91, -0.14) | -0.33<br>(-0.71, 0.04)  | -0.09<br>(-0.45, 0.28)  | 0.09<br>(-0.24, 0.43)   |
| Q3(9.04 - <9.74)                 | 1994/4727           | -0.79<br>(-1.02, -0.55) | -0.50<br>(-0.73, -0.27) | -0.39<br>(-0.62, -0.16) | -0.18<br>(-0.38, 0.02)  | 1955/4627 | -0.89<br>(-1.24, -0.53) | -0.58<br>(-0.94, -0.23) | -0.13<br>(-0.52, 0.25)  | 0.12<br>(-0.22, 0.46)   |
| Q4(≥9.75)                        | 1784/4714           | -1.46<br>(-1.74, -1.19) | -0.96<br>(-1.20, -0.71) | -0.77<br>(-1.05, -0.49) | -0.54<br>(-0.80, -0.29) | 1747/4627 | -2.25<br>(-2.64, -1.87) | -1.76<br>(-2.14, -1.37) | -0.93<br>(-1.42, -0.44) | -0.67<br>(-1.13, -0.21) |
| P trend                          |                     | <0.001                  | <0.001                  | <0.001                  | <0.001                  |           | <0.001                  | <0.001                  | 0.002                   | 0.027                   |
| Dietary folate (DFE, mcg/d)      |                     |                         |                         |                         |                         |           |                         |                         |                         |                         |
| Q1(<8.31)                        |                     | Ref                     | Ref                     | Ref                     | Ref                     | 2144/4643 | Ref                     | Ref                     | Ref                     | Ref                     |
| Q2(8.32 - <8.79)                 | 2188/4727           | -0.56<br>(-0.82, -0.31) | -0.41<br>(-0.66, -0.16) | -0.36<br>(-0.60, -0.12) | -0.26<br>(-0.48, -0.04) | 2017/4654 | -0.67<br>(-1.03, -0.30) | -0.47<br>(-0.84, -0.11) | -0.27<br>(-0.63, 0.10)  | -0.11<br>(-0.45, 0.24)  |
| Q3(8.80 - <9.29)                 | 2070/4743           | -0.62<br>(-0.89, -0.35) | -0.36<br>(-0.61, -0.12) | -0.29<br>(-0.53, -0.05) | -0.17<br>(-0.37, 0.03)  | 1916/4620 | -0.64<br>(-1.03, -0.25) | -0.33<br>(-0.72, 0.05)  | 0.00<br>(-0.41, 0.40)   | 0.15<br>(-0.20, 0.50)   |
| Q4(≥9.30)                        | 1942/4707           | -1.17<br>(-1.43, -0.91) | -0.81<br>(-1.06, -0.56) | -0.70<br>(-0.95, -0.45) | -0.42<br>(-0.64, -0.19) | 1773/4594 | -1.60<br>(-1.98, -1.22) | -1.21<br>(-1.59, -0.84) | -0.75<br>(-1.15, -0.34) | -0.38<br>(-0.77, -0.01) |
| P trend                          | 1821/4712           | <0.001                  | <0.001                  | <0.001                  | 0.002                   |           | <0.001                  | <0.001                  | 0.003                   | 0.023                   |
| Food natural folate (DFE, mcg/d) |                     |                         |                         |                         |                         |           |                         |                         |                         |                         |
| Q1(<7.08)                        |                     | Ref                     | Ref                     | Ref                     | Ref                     | 1931/4651 | Ref                     | Ref                     | Ref                     | Ref                     |
| Q2(7.09 - <7.55)                 | 1977/4744           | -0.53<br>(-0.78, -0.27) | -0.28<br>(-0.52, -0.05) | -0.23<br>(-0.47, 0.02)  | -0.24<br>(-0.47, -0.02) | 1960/4628 | -0.83<br>(-1.23, -0.44) | -0.58<br>(-0.96, -0.19) | -0.34<br>(-0.73, 0.05)  | -0.35<br>(-0.73, 0.03)  |
| Q3(7.56 - <8.01)                 | 1998/4703           | -1.26<br>(-1.54, -0.99) | -0.85<br>(-1.11, -0.60) | -0.75<br>(-1.01, 0.48)  | -0.66<br>(-0.91, -0.40) | 2051/4620 | -1.79<br>(-2.16, -1.42) | -1.37<br>(-1.72, -1.02) | -0.93<br>(-1.32, -0.53) | -0.79<br>(-1.16, -0.41) |
| Q4(≥8.02)                        | 2104/4738           | -1.83<br>(-2.10, -1.56) | -1.26<br>(-1.51, -1.01) | -1.09<br>(-1.37, -0.81) | -1.03<br>(-1.29, -0.77) | 1908/4612 | -2.43<br>(-2.82, -2.04) | -1.90<br>(-2.28, -1.52) | -1.26<br>(-1.70, -0.82) | -1.16<br>(-1.56, -0.75) |
| P trend                          | 1942/4704           | <0.001                  | <0.001                  | <0.001                  | <0.001                  |           | <0.001                  | <0.001                  | <0.001                  | <0.001                  |

Food synthetic folic acid (DFE,  
mcg/d)

|                             |            |                         |                        |                        |                        |            |                         |                        |                        |                         |
|-----------------------------|------------|-------------------------|------------------------|------------------------|------------------------|------------|-------------------------|------------------------|------------------------|-------------------------|
| Q1(<6.34)                   |            | Ref                     | Ref                    | Ref                    | Ref                    | 2043/4655  | Ref                     | Ref                    | Ref                    | Ref                     |
| Q2(6.35 - <7.10)            | 2084/4732  | 0.09<br>(-0.15, 0.33)   | 0.08<br>(-0.15, 0.32)  | 0.03<br>(-0.19, 0.25)  | 0.08<br>(-0.13, 0.29)  | 2054/4613  | 0.11<br>(-0.27, 0.49)   | 0.16<br>(-0.21, 0.54)  | 0.12<br>(-0.24, 0.48)  | 0.18<br>(-0.18, 0.54)   |
| Q3(7.11 - <7.81)            | 2108/4727  | 0.24<br>(-0.03, 0.50)   | 0.24<br>(-0.01, 0.49)  | 0.21<br>(-0.04, 0.47)  | 0.29<br>(0.05, 0.53)   | 1986/4617  | 0.36<br>(-0.07, 0.80)   | 0.45<br>(0.03, 0.87)   | 0.49<br>(0.06, 0.91)   | 0.56<br>(0.16, 0.97)    |
| Q4( $\geq$ 7.82)            | 2018/4708  | -0.32<br>(-0.57, -0.07) | -0.21<br>(-0.44, 0.02) | -0.19<br>(-0.43, 0.05) | 0.04<br>(-0.18, 0.26)  | 1767/4626  | -0.48<br>(-0.85, -0.11) | -0.30<br>(-0.65, 0.04) | -0.14<br>(-0.50, 0.21) | 0.14<br>(-0.23, 0.51)   |
| P trend                     | 1811/4722  | 0.032                   | 0.166                  | 0.27                   | 0.456                  |            | 0.049                   | 0.237                  | 0.787                  | 0.286                   |
| Folic acid supplement taken |            |                         |                        |                        |                        |            |                         |                        |                        |                         |
| No                          | 2495/14561 | Ref                     | Ref                    | Ref                    | Ref                    | 7398/14561 | Ref                     | Ref                    | Ref                    | Ref                     |
| Yes                         | 477/4328   | -0.02<br>(-0.02, -0.01) | -0.01<br>(-0.01, 0.00) | -0.01<br>(-0.01, 0.00) | -0.01<br>(-0.01, 0.00) | 2046/4328  | -0.07<br>(-0.10, -0.04) | -0.03<br>(-0.06, 0.01) | -0.02<br>(-0.05, 0.02) | -0.03<br>(-0.06, -0.01) |
| P value                     |            | <0.001                  | 0.007                  | 0.132                  | 0.020                  |            | <0.001                  | 0.106                  | 0.048                  | 0.017                   |

a Ref indicated the reference group.

b Case/N, the number of case subjects/total.

c Q, quartile.

d Data were listed as beta estimates and 95% confidence intervals.

e Adjustments included age, sex, race/ethnicity, PIR, education level, physical activity level, alcohol consumption, smoking, BM, disease history of diabetes, disease history of hypertension, disease history of dyslipidemia, disease history of cardiovascular disease, energy, vitamin B12, folic acid supplement use, and diet quality.



Supplementary Table 9 The association of the intake of folate from diverse sources with HD and AL.

|                                  | HD                  |                         |                         |                         |                         | AL        |                         |                         |                         |                         |
|----------------------------------|---------------------|-------------------------|-------------------------|-------------------------|-------------------------|-----------|-------------------------|-------------------------|-------------------------|-------------------------|
|                                  | <sup>b</sup> Case/N | Model 1                 | Model 2                 | Model 3                 | Model 4                 | Case/N    | Model 1                 | Model 2                 | Model 3                 | Model 4                 |
|                                  |                     | <sup>d</sup> β(95%CI)   | β(95%CI)                | β (95%CI)               | β (95%CI)               |           | β(95%CI)                | β(95%CI)                | β (95%CI)               | β (95%CI)               |
| Total folate (DFE, mcg/d)        |                     |                         |                         |                         |                         |           |                         |                         |                         |                         |
| <sup>c</sup> Q1(<8.44)           | 2708/4728           | <sup>a</sup> Ref        | Ref                     | Ref                     | Ref                     | 1774/4728 | Ref                     | Ref                     | Ref                     | Ref                     |
| Q2(8.45 - <9.03)                 | 2369/4720           | -0.07<br>(-0.10, -0.03) | -0.05<br>(-0.08, -0.01) | -0.04<br>(-0.07, -0.01) | -0.01<br>(-0.03, 0.02)  | 1546/4720 | -0.01<br>(-0.02, 0.00)  | -0.01<br>(-0.01, 0.00)  | -0.01<br>(-0.02, 0.00)  | 0.00<br>(-0.01, 0.00)   |
| Q3(9.04 - <9.74)                 | 2213/4727           | -0.10<br>(-0.13, -0.06) | -0.07<br>(-0.10, -0.03) | -0.05<br>(-0.09, -0.02) | -0.02<br>(-0.05, 0.01)  | 1404/4727 | -0.02<br>(-0.03, -0.01) | -0.01<br>(-0.02, 0.00)  | -0.02<br>(-0.02, -0.01) | -0.01<br>(-0.02, 0.00)  |
| Q4(≥9.75)                        | 2154/4714           | -0.14<br>(-0.17, -0.10) | -0.09<br>(-0.12, -0.05) | -0.08<br>(-0.12, -0.04) | -0.06<br>(-0.10, -0.02) | 1397/4714 | -0.03<br>(-0.04, -0.02) | -0.02<br>(-0.03, -0.01) | -0.03<br>(-0.03, -0.02) | -0.02<br>(-0.03, -0.01) |
| P trend                          |                     | <0.001                  | <0.001                  | <0.001                  | 0.004                   |           | <0.001                  | <0.001                  | <0.001                  | <0.001                  |
| Dietary folate (DFE, mcg/d)      |                     |                         |                         |                         |                         |           |                         |                         |                         |                         |
| Q1(<8.31)                        | 2667/4730           | Ref                     | Ref                     | Ref                     | Ref                     | 1768/4730 | Ref                     | Ref                     | Ref                     | Ref                     |
| Q2(8.32 - <8.79)                 | 2413/4722           | -0.07<br>(-0.11, -0.04) | -0.06<br>(-0.09, -0.03) | -0.05<br>(-0.08, -0.02) | -0.03<br>(-0.06, 0.00)  | 1545/4722 | -0.02<br>(-0.02, -0.01) | -0.01<br>(-0.02, -0.01) | -0.02<br>(-0.02, -0.01) | -0.01<br>(-0.02, 0.00)  |
| Q3(8.80 - <9.29)                 | 2303/4719           | -0.06<br>(-0.10, -0.02) | -0.04<br>(-0.07, 0.00)  | -0.02<br>(-0.06, 0.01)  | -0.01<br>(-0.04, 0.02)  | 1509/4719 | -0.02<br>(-0.02, -0.01) | -0.01<br>(-0.02, 0.00)  | -0.01<br>(-0.02, -0.01) | -0.01<br>(-0.02, 0.00)  |
| Q4(≥9.30)                        | 2061/4718           | -0.13<br>(-0.16, -0.10) | -0.10<br>(-0.13, -0.07) | -0.08<br>(-0.12, -0.05) | -0.05<br>(-0.08, -0.02) | 1281/4718 | -0.03<br>(-0.04, -0.02) | -0.02<br>(-0.03, -0.01) | -0.03<br>(-0.04, -0.02) | -0.02<br>(-0.03, -0.01) |
| P trend                          |                     | <0.001                  | <0.001                  | <0.001                  | 0.003                   |           | <0.001                  | <0.001                  | <0.001                  | 0.001                   |
| Food natural folate (DFE, mcg/d) |                     |                         |                         |                         |                         |           |                         |                         |                         |                         |
| Q1(<7.08)                        | 2629/4727           | Ref                     | Ref                     | Ref                     | Ref                     | 1746/4727 | Ref                     | Ref                     | Ref                     | Ref                     |
| Q2(7.09 - <7.55)                 | 2483/4743           | -0.05<br>(-0.09, -0.02) | -0.03<br>(-0.06, 0.01)  | -0.02<br>(-0.05, 0.02)  | -0.02<br>(-0.05, 0.01)  | 1624/4743 | -0.01<br>(-0.01, 0.00)  | 0.00<br>(-0.01, 0.01)   | 0.00<br>(-0.01, 0.01)   | 0.00<br>(-0.01, 0.01)   |
| Q3(7.56 - <8.01)                 | 2293/4707           | -0.09<br>(-0.12, -0.06) | -0.05<br>(-0.08, -0.01) | -0.03<br>(-0.06, 0.00)  | -0.02<br>(-0.05, 0.01)  | 1438/4707 | -0.02<br>(-0.03, -0.01) | -0.01<br>(-0.02, 0.00)  | -0.01<br>(-0.02, 0.00)  | -0.01<br>(-0.02, 0.00)  |
| Q4(≥8.02)                        | 2038/4712           | -0.13<br>(-0.16, -0.09) | -0.06<br>(-0.10, -0.03) | -0.04<br>(-0.08, 0.00)  | -0.05<br>(-0.08, -0.01) | 1250/4712 | -0.03<br>(-0.04, -0.02) | -0.02<br>(-0.02, -0.01) | -0.02<br>(-0.03, -0.01) | -0.01<br>(-0.02, -0.01) |
| P trend                          |                     | <0.001                  | <0.001                  | 0.019                   | 0.010                   |           | <0.001                  | <0.001                  | <0.001                  | <0.001                  |

|                                        |            |                         |                         |                         |                         |            |                         |                         |                         |                         |
|----------------------------------------|------------|-------------------------|-------------------------|-------------------------|-------------------------|------------|-------------------------|-------------------------|-------------------------|-------------------------|
| Food synthetic folic acid (DFE, mcg/d) |            |                         |                         |                         |                         |            |                         |                         |                         |                         |
| Q1(<6.34)                              | 2551/4744  | Ref                     | Ref                     | Ref                     | Ref                     | 1661/4744  | Ref                     | Ref                     | Ref                     | Ref                     |
| Q2(6.35 - <7.10)                       | 2442/4703  | -0.02<br>(-0.05, 0.01)  | -0.03<br>(-0.06, 0.01)  | -0.02<br>(-0.06, 0.01)  | -0.01<br>(-0.04, 0.02)  | 1546/4703  | -0.01<br>(-0.01, 0.00)  | -0.01<br>(-0.01, 0.00)  | -0.01<br>(-0.01, 0.00)  | -0.01<br>(-0.01, 0.00)  |
| Q3(7.11 - <7.81)                       | 2334/4738  | -0.02<br>(-0.06, 0.02)  | -0.03<br>(-0.06, 0.01)  | -0.02<br>(-0.05, 0.02)  | 0.00<br>(-0.03, 0.03)   | 1542/4738  | 0.00<br>(-0.01, 0.01)   | 0.00<br>(-0.01, 0.01)   | -0.01<br>(-0.01, 0.00)  | 0.00<br>(-0.01, 0.00)   |
| Q4( $\geq$ 7.82)                       | 2117/4704  | -0.08<br>(-0.11, -0.05) | -0.07<br>(-0.10, -0.05) | -0.06<br>(-0.09, -0.03) | -0.03<br>(-0.06, 0.01)  | 1354/4704  | -0.02<br>(-0.03, -0.01) | -0.02<br>(-0.02, -0.01) | -0.02<br>(-0.03, -0.01) | -0.01<br>(-0.02, -0.01) |
| P trend                                |            | <0.001                  | <0.001                  | <0.001                  | 0.050                   |            | <0.001                  | 0.001                   | <0.001                  | 0.008                   |
| Folic acid supplement taken            |            |                         |                         |                         |                         |            |                         |                         |                         |                         |
| No                                     | 7398/14561 | Ref                     | Ref                     | Ref                     | Ref                     | 4796/14561 | Ref                     | Ref                     | Ref                     | Ref                     |
| Yes                                    | 2046/4328  | -0.97<br>(-1.19, -0.74) | -0.57<br>(-0.79, -0.36) | -0.46<br>(-0.68, -0.24) | -0.46<br>(-0.65, -0.27) | 1307/4328  | -1.70<br>(-2.01, -1.39) | -1.40<br>(-1.71, -1.08) | -1.24<br>(-1.56, -0.93) | -1.29<br>(-1.59, -0.99) |
| P value                                |            | <0.001                  | <0.001                  | <0.001                  | <0.001                  |            | <0.001                  | <0.001                  | <0.001                  | <0.001                  |

a Ref indicated the reference group.

b Case/N, the number of case subjects/total.

c Q, quartile.

d Data were listed as beta estimates and 95% confidence intervals.

e Adjustments included age, sex, race/ethnicity, PIR, education level, physical activity level, alcohol consumption, smoking, BM, disease history of diabetes, disease history of hypertension, disease history of dyslipidemia, disease history of cardiovascular disease, energy, vitamin B12, folic acid supplement use, and diet quality.

Supplementary Table 10 Modification effect of covariates on the association of the intake of folate from diverse sources with biological age indicators.

|                             | Total folate (DFE, mcg/d) |                   | Dietary folate (DFE, mcg/d) |                   | Food natural folate (DFE, mcg/d) |                   | Food synthetic folic acid (DFE, mcg/d) |                   |
|-----------------------------|---------------------------|-------------------|-----------------------------|-------------------|----------------------------------|-------------------|----------------------------------------|-------------------|
|                             | <sup>a</sup> OR(95%CI)    | P for interaction | OR (95%CI)                  | P for interaction | OR (95%CI)                       | P for interaction | OR (95%CI)                             | P for interaction |
| <b>PA</b>                   |                           |                   |                             |                   |                                  |                   |                                        |                   |
| Age                         | 1.04(0.95,1.14)           | 0.415             | 0.97(0.89,1.07)             | 0.554             | 0.95(0.87,1.04)                  | 0.267             | 1.00(0.91,1.10)                        | 0.994             |
| Sex                         | 1.06(0.97,1.15)           | 0.189             | 1.09(1.01,1.17)             | 0.023             | 1.09(1.00,1.19)                  | 0.046             | 1.03(0.95,1.11)                        | 0.451             |
| Race                        | 1.01(0.98,1.05)           | 0.477             | 1.01(0.97,1.04)             | 0.760             | 1.03(1.00,1.06)                  | 0.105             | 1.00(0.96,1.03)                        | 0.807             |
| Smoking                     | 1.02(0.95,1.10)           | 0.561             | 1.10(1.03,1.17)             | 0.008             | 1.03(0.95,1.10)                  | 0.484             | 1.10(1.02,1.19)                        | 0.014             |
| Drinking                    | 0.96(0.91,1.01)           | 0.086             | 0.95(0.90,1.00)             | 0.049             | 0.96(0.92,1.01)                  | 0.110             | 0.97(0.92,1.02)                        | 0.239             |
| Physical activity level     | 0.94(0.90,0.99)           | 0.015             | 0.95(0.91,1.00)             | 0.044             | 0.97(0.93,1.01)                  | 0.166             | 0.98(0.94,1.02)                        | 0.276             |
| Family poverty income ratio | 0.98(0.93,1.04)           | 0.559             | 1.00(0.94,1.05)             | 0.904             | 0.96(0.91,1.01)                  | 0.112             | 1.03(0.97,1.09)                        | 0.301             |
| Education level             | 1.09(0.98,1.20)           | 0.103             | 1.02(0.93,1.11)             | 0.685             | 0.97(0.89,1.07)                  | 0.573             | 1.06(0.97,1.15)                        | 0.219             |
| BMI                         | 1.07(1.00,1.16)           | 0.063             | 1.12(1.05,1.20)             | 0.001             | 1.13(1.04,1.22)                  | 0.004             | 1.08(0.99,1.17)                        | 0.079             |
| Diabetes                    | 0.92(0.82,1.03)           | 0.125             | 1.05(0.94,1.17)             | 0.368             | 1.00(0.90,1.11)                  | 0.953             | 1.09(0.98,1.22)                        | 0.124             |
| Hypertension                | 0.96(0.89,1.04)           | 0.304             | 0.96(0.89,1.03)             | 0.240             | 0.99(0.92,1.07)                  | 0.846             | 0.99(0.92,1.06)                        | 0.726             |
| Dyslipidemia                | 0.99(0.92,1.08)           | 0.852             | 1.01(0.93,1.09)             | 0.861             | 1.00(0.90,1.11)                  | 0.953             | 1.09(0.98,1.22)                        | 0.124             |
| Cardiovascular disease      | 1.08(0.96,1.21)           | 0.194             | 1.10(0.97,1.23)             | 0.136             | 1.01(0.91,1.12)                  | 0.873             | 1.15(1.02,1.29)                        | 0.022             |
| Folic acid supplement use   | 0.98(0.83,1.16)           | 0.791             | 1.06(0.96,1.17)             | 0.231             | 0.99(0.88,1.11)                  | 0.849             | 1.12(1.02,1.22)                        | 0.014             |
| <b>KDM</b>                  |                           |                   |                             |                   |                                  |                   |                                        |                   |
| Age                         | 0.93(0.81,1.05)           | 0.241             | 0.90(0.80,1.01)             | 0.072             | 0.91(0.80,1.02)                  | 0.098             | 0.91(0.81,1.02)                        | 0.095             |
| Sex                         | 1.19(1.07,1.32)           | 0.002             | 1.14(1.01,1.28)             | 0.030             | 1.19(1.07,1.32)                  | 0.001             | 1.08(0.96,1.20)                        | 0.187             |
| Race                        | 0.97(0.93,1.02)           | 0.253             | 0.99(0.94,1.04)             | 0.648             | 0.98(0.93,1.02)                  | 0.315             | 0.97(0.93,1.02)                        | 0.267             |
| Smoking                     | 0.99(0.90,1.08)           | 0.794             | 0.99(0.91,1.08)             | 0.869             | 0.99(0.90,1.09)                  | 0.882             | 0.99(0.91,1.08)                        | 0.821             |
| Drinking                    | 0.98(0.91,1.05)           | 0.520             | 0.94(0.87,1.01)             | 0.103             | 0.91(0.84,0.98)                  | 0.017             | 0.98(0.92,1.05)                        | 0.622             |

|                             |                 |       |                 |       |                 |       |                 |       |
|-----------------------------|-----------------|-------|-----------------|-------|-----------------|-------|-----------------|-------|
| Physical activity level     | 0.96(0.90,1.03) | 0.267 | 0.91(0.85,0.98) | 0.012 | 0.97(0.91,1.04) | 0.356 | 0.94(0.89,1.00) | 0.046 |
| Family poverty income ratio | 0.93(0.88,0.99) | 0.031 | 0.96(0.90,1.03) | 0.234 | 0.94(0.88,1.01) | 0.075 | 0.99(0.92,1.06) | 0.745 |
| Education level             | 1.01(0.89,1.14) | 0.917 | 0.95(0.83,1.08) | 0.404 | 0.94(0.84,1.05) | 0.257 | 1.01(0.90,1.14) | 0.826 |
| BMI                         | 1.07(0.97,1.18) | 0.181 | 1.13(1.02,1.26) | 0.019 | 1.10(0.99,1.21) | 0.067 | 1.13(1.02,1.25) | 0.022 |
| Diabetes                    | 0.95(0.84,1.06) | 0.345 | 1.04(0.92,1.18) | 0.502 | 1.07(0.93,1.22) | 0.338 | 1.05(0.93,1.18) | 0.471 |
| Hypertension                | 0.96(0.86,1.07) | 0.430 | 1.05(0.93,1.17) | 0.454 | 1.10(0.99,1.22) | 0.070 | 1.04(0.95,1.13) | 0.456 |
| Dyslipidemia                | 0.92(0.84,1.02) | 0.098 | 0.95(0.85,1.07) | 0.378 | 1.07(0.93,1.22) | 0.338 | 1.05(0.93,1.18) | 0.471 |
| Cardiovascular disease      | 0.97(0.85,1.11) | 0.683 | 1.03(0.89,1.19) | 0.701 | 0.96(0.83,1.11) | 0.584 | 1.08(0.93,1.24) | 0.313 |
| Folic acid supplement use   | 0.90(0.86,0.95) | 0.000 | 0.86(0.81,0.91) | 0.000 | 0.87(0.81,0.92) | 0.000 | 0.86(0.81,0.91) | 0.000 |
| HD                          |                 |       |                 |       |                 |       |                 |       |
| Age                         | 0.96(0.88,1.06) | 0.439 | 0.97(0.88,1.07) | 0.520 | 0.92(0.83,1.01) | 0.093 | 1.00(0.91,1.10) | 0.961 |
| Sex                         | 1.06(0.98,1.15) | 0.166 | 0.97(0.88,1.07) | 0.002 | 1.05(0.96,1.14) | 0.320 | 1.12(1.04,1.21) | 0.005 |
| Race                        | 1.03(0.99,1.07) | 0.155 | 1.03(0.99,1.07) | 0.164 | 1.00(0.97,1.03) | 0.949 | 1.02(0.99,1.06) | 0.248 |
| Smoking                     | 0.97(0.88,1.06) | 0.451 | 1.02(0.94,1.10) | 0.665 | 1.05(0.97,1.14) | 0.210 | 1.00(0.91,1.08) | 0.901 |
| Drinking                    | 1.01(0.95,1.07) | 0.823 | 0.97(0.91,1.03) | 0.323 | 0.96(0.90,1.01) | 0.097 | 1.00(0.95,1.06) | 0.912 |
| Physical activity level     | 0.99(0.95,1.04) | 0.641 | 1.01(0.96,1.05) | 0.744 | 0.97(0.93,1.02) | 0.290 | 1.02(0.98,1.07) | 0.279 |
| Family poverty income ratio | 0.96(0.91,1.02) | 0.159 | 1.00(0.93,1.07) | 0.927 | 0.96(0.91,1.03) | 0.234 | 1.04(0.97,1.11) | 0.302 |
| Education level             | 1.06(0.97,1.16) | 0.217 | 1.02(0.92,1.13) | 0.659 | 0.95(0.86,1.04) | 0.258 | 1.02(0.93,1.12) | 0.693 |
| BMI                         | 0.97(0.89,1.06) | 0.514 | 1.03(0.95,1.13) | 0.482 | 1.08(1.01,1.17) | 0.034 | 1.01(0.92,1.10) | 0.850 |
| Diabetes                    | 1.15(1.02,1.31) | 0.237 | 1.03(0.86,1.22) | 0.782 | 0.94(0.81,1.10) | 0.443 | 1.06(0.88,1.27) | 0.521 |
| Hypertension                | 0.98(0.89,1.08) | 0.574 | 1.03(0.95,1.11) | 0.473 | 1.04(0.96,1.12) | 0.332 | 1.03(0.96,1.10) | 0.480 |
| Dyslipidemia                | 0.91(0.84,1.00) | 0.093 | 0.96(0.88,1.04) | 0.288 | 0.94(0.81,1.10) | 0.443 | 1.06(0.88,1.27) | 0.521 |
| Cardiovascular disease      | 0.85(0.72,1.01) | 0.027 | 1.06(0.92,1.21) | 0.424 | 0.89(0.76,1.03) | 0.119 | 1.15(1.01,1.31) | 0.038 |
| Folic acid supplement use   | 1.03(0.90,1.17) | 0.248 | 1.02(0.92,1.13) | 0.720 | 0.94(0.86,1.03) | 0.172 | 1.05(0.94,1.16) | 0.413 |
| AL                          |                 |       |                 |       |                 |       |                 |       |
| Age                         | 0.94(0.88,1.01) | 0.083 | 0.97(0.90,1.06) | 0.502 | 0.93(0.84,1.02) | 0.099 | 1.00(0.92,1.09) | 0.935 |

|                             |                 |       |                 |       |                 |       |                 |       |
|-----------------------------|-----------------|-------|-----------------|-------|-----------------|-------|-----------------|-------|
| Sex                         | 1.03(0.95,1.12) | 0.488 | 1.03(0.95,1.12) | 0.482 | 1.05(0.96,1.16) | 0.302 | 0.97(0.90,1.05) | 0.406 |
| Race                        | 0.98(0.94,1.01) | 0.177 | 0.97(0.94,1.00) | 0.039 | 0.99(0.95,1.02) | 0.443 | 0.98(0.94,1.01) | 0.173 |
| Smoking                     | 1.00(0.91,1.09) | 0.973 | 0.99(0.92,1.07) | 0.789 | 1.01(0.93,1.09) | 0.883 | 0.98(0.90,1.06) | 0.548 |
| Drinking                    | 1.01(0.95,1.08) | 0.776 | 1.01(0.96,1.07) | 0.710 | 0.97(0.92,1.03) | 0.312 | 1.00(0.95,1.06) | 0.867 |
| Physical activity level     | 0.99(0.93,1.05) | 0.708 | 0.98(0.93,1.03) | 0.407 | 0.99(0.95,1.04) | 0.673 | 0.99(0.95,1.04) | 0.670 |
| Family poverty income ratio | 0.96(0.90,1.03) | 0.216 | 1.00(0.94,1.07) | 0.914 | 0.96(0.91,1.02) | 0.215 | 1.01(0.95,1.09) | 0.717 |
| Education level             | 1.00(0.91,1.10) | 0.979 | 0.96(0.88,1.06) | 0.440 | 0.99(0.90,1.09) | 0.836 | 0.95(0.87,1.04) | 0.271 |
| BMI                         | 0.96(0.89,1.03) | 0.249 | 1.00(0.92,1.10) | 0.924 | 1.02(0.95,1.11) | 0.544 | 0.99(0.91,1.09) | 0.895 |
| Diabetes                    | 0.92(0.83,1.02) | 0.106 | 1.00(0.91,1.10) | 0.977 | 0.97(0.88,1.08) | 0.617 | 1.02(0.92,1.13) | 0.734 |
| Hypertension                | 0.99(0.91,1.08) | 0.830 | 0.96(0.87,1.05) | 0.333 | 0.97(0.89,1.05) | 0.400 | 0.99(0.91,1.09) | 0.893 |
| Dyslipidemia                | 0.96(0.88,1.05) | 0.352 | 0.97(0.90,1.05) | 0.436 | 0.97(0.88,1.08) | 0.617 | 1.02(0.92,1.13) | 0.734 |
| Cardiovascular disease      | 1.11(0.99,1.25) | 0.079 | 1.11(0.99,1.24) | 0.074 | 0.98(0.87,1.10) | 0.745 | 1.18(1.05,1.33) | 0.005 |
| Folic acid supplement use   | 1.06(0.90,1.25) | 0.459 | 0.99(0.91,1.07) | 0.721 | 0.92(0.83,1.03) | 0.135 | 1.04(0.94,1.13) | 0.465 |

a Data were listed as odds risk and 95% confidence intervals.

b Adjustments included age, sex, race/ethnicity, PIR, education level, physical activity level, drinking, smoking, BMI, disease history of diabetes, disease history of hypertension, disease history of dyslipidemia, disease history of cardiovascular disease, energy, vitamin B12, and diet quality.

Supplementary Table 11 Association of the intake of total folate with biological age indicators stratified by variables of interest.

|    |                         | Total folate (DFE, mcg/d) |                  |                 |                 | P value         |        |
|----|-------------------------|---------------------------|------------------|-----------------|-----------------|-----------------|--------|
|    |                         | <sup>b</sup> Q1           | Q2               | Q3              | Q4              |                 |        |
|    |                         | <sup>c</sup> OR (95%CI)   | OR (95%CI)       | OR (95%CI)      | OR (95%CI)      |                 |        |
| PA |                         |                           |                  |                 |                 |                 |        |
|    | Age                     |                           |                  |                 |                 |                 |        |
|    |                         | <65                       | <sup>a</sup> Ref | 0.99(0.85,1.15) | 0.90(0.78,1.05) | 0.74(0.61,0.89) | 0.004  |
|    |                         | ≥65                       | Ref              | 0.95(0.74,1.22) | 0.74(0.57,0.96) | 0.75(0.50,1.12) | 0.066  |
|    | Sex                     |                           |                  |                 |                 |                 |        |
|    |                         | Male                      | Ref              | 0.86(0.71,1.04) | 0.74(0.62,0.90) | 0.65(0.53,0.79) | <0.001 |
|    |                         | Female                    | Ref              | 0.91(0.76,1.08) | 0.94(0.78,1.13) | 0.90(0.68,1.18) | 0.841  |
|    | Smoking                 |                           |                  |                 |                 |                 |        |
|    |                         | Yes                       | Ref              | 0.94(0.80,1.11) | 0.83(0.69,1.00) | 0.72(0.58,0.89) | 0.007  |
|    |                         | No                        | Ref              | 1.03(0.87,1.23) | 0.94(0.79,1.12) | 0.81(0.64,1.01) | 0.196  |
|    | Drinking                |                           |                  |                 |                 |                 |        |
|    |                         | None                      | Ref              | 0.99(0.86,1.15) | 0.95(0.81,1.11) | 0.80(0.67,0.95) | 0.041  |
|    |                         | Moderate                  | Ref              | 0.90(0.67,1.20) | 0.83(0.61,1.13) | 0.75(0.49,1.15) | 0.545  |
|    |                         | Heavy                     | Ref              | 0.80(0.56,1.14) | 0.65(0.45,0.94) | 0.54(0.36,0.82) | 0.013  |
|    | Physical activity level |                           |                  |                 |                 |                 |        |
|    |                         | Mild                      | Ref              | 0.94(0.79,1.11) | 0.94(0.80,1.11) | 0.81(0.68,0.98) | 0.084  |
|    |                         | Moderate                  | Ref              | 0.96(0.76,1.20) | 0.70(0.55,0.89) | 0.63(0.48,0.84) | 0.005  |
|    | BMI                     |                           |                  |                 |                 |                 |        |
|    |                         | <30                       | Ref              | 0.86(0.74,1.00) | 0.68(0.57,0.81) | 0.67(0.54,0.82) | <0.001 |
|    |                         | ≥30                       | Ref              | 1.11(0.93,1.32) | 1.09(0.90,1.34) | 0.90(0.70,1.14) | 0.696  |
|    | Cardiovascular disease  |                           |                  |                 |                 |                 |        |

|     |                           |          |                 |                 |                 |                 |        |
|-----|---------------------------|----------|-----------------|-----------------|-----------------|-----------------|--------|
| KDM | Folic acid supplement use | Yes      | Ref             | 0.94(0.67,1.32) | 1.17(0.75,1.83) | 0.93(0.56,1.57) | 1.000  |
|     |                           | No       | Ref             | 0.96(0.84,1.09) | 0.84(0.73,0.96) | 0.72(0.61,0.85) | <0.001 |
|     |                           | Yes      | Ref             | 0.71(0.57,0.88) | 0.76(0.57,1.01) | 0.80(0.60,1.07) | 0.006  |
|     |                           | No       | Ref             | 0.86(0.74,1.00) | 0.83(0.72,0.95) | 0.72(0.62,0.83) | <0.001 |
|     | Age                       | <65      | Ref             | 0.94(0.80,1.11) | 0.96(0.79,1.16) | 0.65(0.54,0.78) | <0.001 |
|     |                           | ≥65      | Ref             | 0.99(0.74,1.32) | 0.64(0.42,0.99) | 0.62(0.41,0.93) | 0.006  |
|     | Sex                       | Male     | Ref             | 0.72(0.58,0.91) | 0.48(0.37,0.63) | 0.83(0.67,1.03) | <0.001 |
|     |                           | Female   | Ref             | 0.97(0.77,1.22) | 0.76(0.59,0.97) | 1.01(0.83,1.23) | 0.083  |
|     | Smoking                   | Yes      | Ref             | 0.92(0.72,1.16) | 0.64(0.50,0.83) | 0.93(0.74,1.16) | 0.001  |
|     |                           | No       | Ref             | 0.85(0.67,1.09) | 0.61(0.49,0.77) | 0.96(0.82,1.11) | <0.001 |
|     | Drinking                  | None     | Ref             | 0.85(0.71,1.02) | 0.64(0.54,0.77) | 1.11(0.70,1.74) | <0.001 |
|     |                           | Moderate | Ref             | 1.00(0.63,1.60) | 0.63(0.39,1.04) | 1.02(0.67,1.55) | 0.055  |
|     |                           | Heavy    | Ref             | 0.69(0.42,1.13) | 0.88(0.73,1.06) | 0.96(0.77,1.20) | 0.140  |
|     | Physical activity level   | Mild     | Ref             | 0.88(0.73,1.06) | 0.96(0.77,1.20) | 0.63(0.51,0.77) | <0.001 |
|     |                           | Moderate | Ref             | 0.83(0.63,1.09) | 0.76(0.55,1.04) | 0.50(0.37,0.68) | <0.001 |
|     | BMI                       | <30      | Ref             | 0.85(0.70,1.04) | 0.95(0.73,1.22) | 0.63(0.49,0.80) | 0.002  |
| ≥30 |                           | Ref      | 1.07(0.85,1.34) | 0.79(0.62,1.00) | 0.70(0.55,0.90) | <0.001          |        |

|                         |                           |          |                 |                 |                 |                 |        |
|-------------------------|---------------------------|----------|-----------------|-----------------|-----------------|-----------------|--------|
| HD                      | Cardiovascular disease    |          |                 |                 |                 |                 |        |
|                         |                           | Yes      | Ref             | 0.75(0.52,1.07) | 0.72(0.48,1.10) | 0.61(0.41,0.89) | 0.018  |
|                         |                           | No       | Ref             | 0.96(0.82,1.13) | 0.95(0.79,1.14) | 0.65(0.53,0.79) | <0.001 |
|                         | Folic acid supplement use |          |                 |                 |                 |                 |        |
|                         |                           | Yes      | Ref             | 0.63(0.44,0.89) | 0.64(0.42,0.97) | 0.79(0.53,1.16) | 0.334  |
|                         |                           | No       | Ref             | 0.83(0.68,1.01) | 0.87(0.73,1.05) | 0.92(0.79,1.07) | 0.072  |
|                         | Age                       |          |                 |                 |                 |                 |        |
|                         |                           | <65      | Ref             | 0.84(0.73,0.97) | 0.86(0.73,1.02) | 0.71(0.57,0.87) | 0.004  |
|                         |                           | ≥65      | Ref             | 0.95(0.76,1.19) | 0.77(0.59,1.01) | 0.64(0.43,0.94) | 0.075  |
|                         | Sex                       |          |                 |                 |                 |                 |        |
|                         |                           | Male     | Ref             | 0.81(0.67,0.97) | 0.83(0.70,0.98) | 0.64(0.51,0.82) | 0.001  |
|                         |                           | Female   | Ref             | 0.86(0.72,1.04) | 0.98(0.80,1.21) | 0.73(0.54,1.01) | 0.163  |
|                         | Smoking                   |          |                 |                 |                 |                 |        |
|                         |                           | Yes      | Ref             | 0.74(0.63,0.86) | 0.80(0.66,0.97) | 0.73(0.56,0.96) | 0.001  |
|                         |                           | No       | Ref             | 0.98(0.82,1.18) | 0.93(0.76,1.15) | 0.74(0.58,0.93) | 0.032  |
|                         | Drinking                  |          |                 |                 |                 |                 |        |
|                         |                           | None     | Ref             | 0.90(0.77,1.06) | 0.96(0.80,1.15) | 0.71(0.54,0.92) | 0.028  |
|                         |                           | Moderate | Ref             | 1.30(0.95,1.78) | 1.29(0.88,1.90) | 1.01(0.67,1.54) | 0.306  |
|                         |                           | Heavy    | Ref             | 0.59(0.41,0.84) | 0.66(0.46,0.96) | 0.60(0.35,1.01) | 0.011  |
| Physical activity level |                           |          |                 |                 |                 |                 |        |
|                         | Mild                      | Ref      | 0.94(0.79,1.12) | 0.94(0.77,1.16) | 0.76(0.57,1.02) | 0.189           |        |
|                         | Moderate                  | Ref      | 0.89(0.70,1.14) | 0.81(0.65,1.02) | 0.54(0.41,0.72) | <0.001          |        |
| BMI                     |                           |          |                 |                 |                 |                 |        |
|                         | <30                       | Ref      | 0.87(0.72,1.05) | 0.91(0.75,1.09) | 0.75(0.58,0.96) | 0.064           |        |



|     |                           |          |     |                 |                 |                 |        |
|-----|---------------------------|----------|-----|-----------------|-----------------|-----------------|--------|
| AL  | Cardiovascular disease    | ≥30      | Ref | 0.95(0.77,1.16) | 1.14(0.92,1.42) | 0.81(0.60,1.08) | 0.437  |
|     |                           | Yes      | Ref | 0.96(0.84,1.10) | 0.88(0.75,1.04) | 0.75(0.64,0.89) | 1.000  |
|     |                           | No       | Ref | 0.85(0.75,0.97) | 0.87(0.74,1.03) | 0.70(0.57,0.85) | 0.001  |
|     | Folic acid supplement use | Yes      | Ref | 0.72(0.55,0.94) | 0.69(0.49,0.95) | 0.75(0.57,0.99) | 0.052  |
|     |                           | No       | Ref | 0.76(0.66,0.87) | 0.83(0.71,0.97) | 0.72(0.61,0.85) | <0.001 |
|     | Age                       | <65      | Ref | 0.93(0.80,1.08) | 0.96(0.80,1.15) | 0.81(0.67,0.99) | 0.104  |
|     |                           | ≥65      | Ref | 1.15(0.92,1.44) | 0.72(0.58,0.91) | 0.63(0.48,0.84) | 0.006  |
|     | Sex                       | Male     | Ref | 0.89(0.73,1.10) | 0.84(0.70,1.02) | 0.65(0.50,0.84) | 0.004  |
|     |                           | Female   | Ref | 0.87(0.73,1.02) | 0.96(0.79,1.18) | 0.76(0.61,0.94) | 0.04   |
|     | Smoking                   | Yes      | Ref | 0.94(0.76,1.17) | 0.92(0.76,1.11) | 0.71(0.55,0.93) | 0.038  |
|     |                           | No       | Ref | 1.07(0.89,1.30) | 0.96(0.75,1.23) | 0.75(0.59,0.95) | 0.058  |
|     | Drinking                  | None     | Ref | 0.91(0.77,1.06) | 0.95(0.81,1.11) | 0.68(0.55,0.83) | 0.001  |
|     |                           | Moderate | Ref | 1.21(0.89,1.64) | 1.05(0.78,1.43) | 0.98(0.70,1.35) | 0.645  |
|     |                           | Heavy    | Ref | 0.92(0.65,1.30) | 0.66(0.47,0.93) | 0.66(0.42,1.03) | 0.053  |
|     | Physical activity level   | Mild     | Ref | 0.90(0.77,1.06) | 0.95(0.80,1.12) | 0.67(0.54,0.84) | 0.002  |
|     |                           | Moderate | Ref | 0.88(0.71,1.09) | 0.81(0.65,1.01) | 0.66(0.52,0.84) | 0.002  |
| BMI |                           |          |     |                 |                 |                 |        |

|                           |     |     |                 |                 |                 |       |
|---------------------------|-----|-----|-----------------|-----------------|-----------------|-------|
|                           | <30 | Ref | 0.97(0.84,1.12) | 0.85(0.70,1.04) | 0.75(0.63,0.91) | 0.008 |
|                           | ≥30 | Ref | 0.84(0.70,1.01) | 0.98(0.80,1.19) | 0.74(0.57,0.97) | 0.083 |
| Cardiovascular disease    |     |     |                 |                 |                 |       |
|                           | Yes | Ref | 1.16(0.79,1.70) | 1.28(0.86,1.91) | 1.22(0.72,2.08) | 0.651 |
|                           | No  | Ref | 0.96(0.84,1.10) | 0.88(0.75,1.04) | 0.75(0.64,0.89) | 0.003 |
| Folic acid supplement use |     |     |                 |                 |                 |       |
|                           | Yes | Ref | 0.78(0.62,0.99) | 0.79(0.62,1.00) | 0.73(0.55,0.98) | 0.101 |
|                           | No  | Ref | 0.80(0.68,0.94) | 0.84(0.71,1.00) | 0.72(0.60,0.85) | 0.001 |

a Ref indicated the reference group.

b Q, quartile.

c Data were listed as odds risk and 95% confidence intervals.

d Adjustments included age, sex, race/ethnicity, PIR, education level, physical activity level, drinking, smoking, BMI, disease history of diabetes, disease history of hypertension, disease history of dyslipidemia, disease history of cardiovascular disease, energy, vitamin B12, and diet quality.

Supplementary Table 12 Association of the intake of dietary folate with biological age indicators stratified by variables of interest.

|    |                         | Dietary folate (DFE, mcg/d) |                  |                 |                 | P value         |        |
|----|-------------------------|-----------------------------|------------------|-----------------|-----------------|-----------------|--------|
|    |                         | <sup>b</sup> Q1             | Q2               | Q3              | Q4              |                 |        |
|    |                         | <sup>c</sup> OR (95%CI)     | OR (95%CI)       | OR (95%CI)      | OR (95%CI)      |                 |        |
| PA |                         |                             |                  |                 |                 |                 |        |
|    | Age                     |                             |                  |                 |                 |                 |        |
|    |                         | <65                         | <sup>a</sup> Ref | 0.94(0.81,1.10) | 0.91(0.78,1.05) | 0.81(0.69,0.95) | 0.032  |
|    |                         | ≥65                         | Ref              | 0.86(0.67,1.10) | 0.84(0.65,1.08) | 0.77(0.58,1.01) | 0.166  |
|    | Sex                     |                             |                  |                 |                 |                 |        |
|    |                         | Male                        | Ref              | 0.85(0.71,1.02) | 0.83(0.67,1.02) | 0.67(0.56,0.81) | <0.001 |
|    |                         | Female                      | Ref              | 0.94(0.78,1.12) | 0.98(0.82,1.16) | 0.85(0.72,1.02) | 0.218  |
|    | Smoking                 |                             |                  |                 |                 |                 |        |
|    |                         | Yes                         | Ref              | 0.88(0.73,1.06) | 0.82(0.69,0.98) | 0.71(0.59,0.84) | 0.001  |
|    |                         | No                          | Ref              | 0.98(0.80,1.19) | 0.99(0.85,1.15) | 0.88(0.73,1.06) | 0.492  |
|    | Drinking                |                             |                  |                 |                 |                 |        |
|    |                         | None                        | Ref              | 0.90(0.78,1.05) | 0.95(0.83,1.09) | 0.83(0.71,0.96) | 0.046  |
|    |                         | Moderate                    | Ref              | 0.84(0.62,1.14) | 0.76(0.58,1.00) | 0.82(0.59,1.15) | 0.158  |
|    |                         | Heavy                       | Ref              | 0.86(0.62,1.20) | 0.76(0.52,1.12) | 0.55(0.37,0.82) | 0.010  |
|    | Physical activity level |                             |                  |                 |                 |                 |        |
|    |                         | Mild                        | Ref              | 0.91(0.77,1.07) | 0.92(0.78,1.09) | 0.87(0.74,1.02) | 0.243  |
|    |                         | Moderate                    | Ref              | 1.01(0.81,1.27) | 0.91(0.73,1.13) | 0.70(0.55,0.90) | 0.016  |
|    | BMI                     |                             |                  |                 |                 |                 |        |
|    |                         | <30                         | Ref              | 0.88(0.74,1.04) | 0.79(0.67,0.94) | 0.66(0.56,0.79) | <0.001 |
|    |                         | ≥30                         | Ref              | 1.07(0.90,1.28) | 1.05(0.88,1.25) | 1.06(0.89,1.26) | 1.000  |
|    | Cardiovascular disease  |                             |                  |                 |                 |                 |        |

|          |                           |          |                 |                 |                 |                 |        |
|----------|---------------------------|----------|-----------------|-----------------|-----------------|-----------------|--------|
| KDM      | Folic acid supplement use | Yes      | Ref             | 1.32(0.94,1.86) | 1.02(0.66,1.57) | 1.29(0.86,1.92) | 0.316  |
|          |                           | No       | Ref             | 0.90(0.78,1.05) | 0.87(0.76,1.00) | 0.77(0.66,0.90) | 0.003  |
|          |                           | Yes      | Ref             | 1.10(0.84,1.44) | 0.94(0.71,1.24) | 0.95(0.72,1.25) | 1.000  |
|          |                           | No       | Ref             | 0.86(0.74,1.00) | 0.83(0.72,0.95) | 0.72(0.62,0.83) | <0.001 |
|          | Age                       | <65      | Ref             | 0.88(0.73,1.06) | 0.91(0.74,1.11) | 0.83(0.66,1.05) | 0.169  |
|          |                           | ≥65      | Ref             | 1.19(0.84,1.68) | 0.90(0.63,1.28) | 0.69(0.46,1.04) | 0.045  |
|          | Sex                       | Male     | Ref             | 0.83(0.65,1.05) | 0.65(0.51,0.83) | 0.79(0.63,0.98) | <0.001 |
|          |                           | Female   | Ref             | 0.87(0.67,1.13) | 0.88(0.69,1.12) | 0.99(0.82,1.20) | 0.525  |
|          | Smoking                   | Yes      | Ref             | 0.94(0.75,1.18) | 0.85(0.67,1.08) | 0.78(0.60,1.01) | 0.173  |
|          |                           | No       | Ref             | 0.83(0.64,1.08) | 0.72(0.55,0.94) | 0.97(0.81,1.16) | 0.036  |
|          | Drinking                  | None     | Ref             | 0.84(0.68,1.03) | 0.88(0.72,1.08) | 0.91(0.60,1.37) | 0.137  |
|          |                           | Moderate | Ref             | 0.91(0.56,1.48) | 0.76(0.48,1.20) | 0.87(0.53,1.42) | 0.285  |
|          |                           | Heavy    | Ref             | 0.74(0.39,1.41) | 0.96(0.78,1.18) | 0.97(0.78,1.19) | 0.545  |
|          | Physical activity level   | Mild     | Ref             | 0.96(0.78,1.18) | 0.97(0.78,1.19) | 0.96(0.77,1.20) | 0.760  |
| Moderate |                           | Ref      | 0.93(0.70,1.24) | 0.84(0.59,1.20) | 0.67(0.47,0.96) | 0.030           |        |
| BMI      | <30                       | Ref      | 0.86(0.70,1.06) | 0.87(0.68,1.12) | 0.87(0.69,1.10) | 0.344           |        |
|          | ≥30                       | Ref      | 1.01(0.79,1.29) | 0.85(0.64,1.14) | 0.76(0.56,1.01) | 0.039           |        |

|          |                           |                 |                 |                 |                 |        |  |
|----------|---------------------------|-----------------|-----------------|-----------------|-----------------|--------|--|
| HD       | Cardiovascular disease    |                 |                 |                 |                 |        |  |
|          | Yes                       | Ref             | 0.97(0.67,1.39) | 0.88(0.59,1.33) | 0.87(0.56,1.35) | 0.461  |  |
|          | No                        | Ref             | 0.88(0.73,1.07) | 0.89(0.73,1.09) | 0.79(0.63,0.98) | 0.051  |  |
|          | Folic acid supplement use |                 |                 |                 |                 |        |  |
|          | Yes                       | Ref             | 0.94(0.61,1.46) | 1(0.64,1.57)    | 0.8(0.47,1.35)  | 0.469  |  |
|          | No                        | Ref             | 0.83(0.68,1.01) | 0.87(0.73,1.05) | 0.92(0.79,1.07) | 0.072  |  |
|          | Age                       |                 |                 |                 |                 |        |  |
|          | <65                       | Ref             | 0.90(0.77,1.05) | 0.89(0.75,1.07) | 0.87(0.72,1.05) | 0.459  |  |
|          | ≥65                       | Ref             | 0.87(0.70,1.06) | 0.84(0.67,1.06) | 0.72(0.55,0.94) | 0.046  |  |
|          | Sex                       |                 |                 |                 |                 |        |  |
|          | Male                      | Ref             | 0.76(0.65,0.90) | 0.80(0.65,0.97) | 0.68(0.57,0.81) | <0.001 |  |
|          | Female                    | Ref             | 0.86(0.71,1.03) | 0.86(0.71,1.05) | 0.85(0.68,1.06) | 0.304  |  |
|          | Smoking                   |                 |                 |                 |                 |        |  |
|          | Yes                       | Ref             | 0.75(0.61,0.91) | 0.73(0.60,0.89) | 0.75(0.60,0.95) | 0.006  |  |
|          | No                        | Ref             | 0.96(0.80,1.17) | 1.02(0.83,1.26) | 0.90(0.73,1.10) | 0.903  |  |
|          | Drinking                  |                 |                 |                 |                 |        |  |
|          | None                      | Ref             | 0.86(0.74,1.01) | 0.86(0.73,1.01) | 0.81(0.68,0.98) | 0.081  |  |
|          | Moderate                  | Ref             | 1.36(0.99,1.87) | 1.21(0.83,1.76) | 1.34(0.92,1.95) | 0.164  |  |
|          | Heavy                     | Ref             | 0.67(0.46,0.96) | 0.88(0.57,1.34) | 0.69(0.42,1.13) | 0.095  |  |
|          | Physical activity level   |                 |                 |                 |                 |        |  |
| Mild     | Ref                       | 0.86(0.73,1.00) | 0.85(0.70,1.02) | 0.78(0.62,0.97) | 0.078           |        |  |
| Moderate | Ref                       | 0.90(0.72,1.14) | 0.88(0.70,1.10) | 0.80(0.61,1.05) | 0.327           |        |  |
| BMI      |                           |                 |                 |                 |                 |        |  |
| <30      | Ref                       | 0.87(0.71,1.07) | 0.87(0.70,1.09) | 0.84(0.67,1.05) | 0.385           |        |  |

|     |                           |          |     |                 |                 |                 |        |
|-----|---------------------------|----------|-----|-----------------|-----------------|-----------------|--------|
| AL  | Cardiovascular disease    | ≥30      | Ref | 0.79(0.63,0.98) | 0.98(0.79,1.21) | 0.83(0.67,1.03) | 0.092  |
|     |                           | Yes      | Ref | 0.86(0.63,1.17) | 0.68(0.48,0.96) | 0.86(0.59,1.24) | 0.088  |
|     |                           | No       | Ref | 0.82(0.71,0.95) | 0.89(0.75,1.05) | 0.81(0.68,0.97) | 0.025  |
|     | Folic acid supplement use | Yes      | Ref | 0.92(0.69,1.22) | 0.93(0.70,1.24) | 0.81(0.59,1.11) | 0.572  |
|     |                           | No       | Ref | 0.76(0.66,0.87) | 0.83(0.71,0.97) | 0.72(0.61,0.85) | <0.001 |
|     | Age                       | <65      | Ref | 0.85(0.73,0.99) | 0.88(0.74,1.04) | 0.80(0.67,0.95) | 0.035  |
|     |                           | ≥65      | Ref | 0.86(0.68,1.08) | 0.92(0.71,1.19) | 0.71(0.56,0.90) | 0.016  |
|     | Sex                       | Male     | Ref | 0.87(0.72,1.05) | 0.86(0.71,1.03) | 0.69(0.56,0.85) | 0.002  |
|     |                           | Female   | Ref | 0.92(0.79,1.08) | 1.00(0.84,1.18) | 0.81(0.67,0.99) | 0.132  |
|     | Smoking                   | Yes      | Ref | 0.81(0.67,0.98) | 0.88(0.71,1.10) | 0.77(0.62,0.96) | 0.059  |
|     |                           | No       | Ref | 0.92(0.78,1.09) | 0.99(0.81,1.20) | 0.79(0.63,0.99) | 0.125  |
|     | Drinking                  | None     | Ref | 0.85(0.72,0.99) | 0.88(0.75,1.02) | 0.74(0.63,0.87) | 0.001  |
|     |                           | Moderate | Ref | 1.01(0.75,1.37) | 0.88(0.63,1.22) | 0.88(0.64,1.21) | 1.000  |
|     |                           | Heavy    | Ref | 0.87(0.59,1.27) | 1.08(0.74,1.56) | 0.64(0.43,0.96) | 0.095  |
|     | Physical activity level   | Mild     | Ref | 0.84(0.72,0.99) | 0.96(0.80,1.14) | 0.73(0.60,0.89) | 0.006  |
|     |                           | Moderate | Ref | 0.93(0.77,1.12) | 0.78(0.65,0.94) | 0.73(0.59,0.92) | 0.023  |
| BMI |                           |          |     |                 |                 |                 |        |

|                           |     |     |                 |                 |                 |       |
|---------------------------|-----|-----|-----------------|-----------------|-----------------|-------|
|                           | <30 | Ref | 0.90(0.76,1.06) | 0.92(0.77,1.09) | 0.75(0.62,0.91) | 0.011 |
|                           | ≥30 | Ref | 0.81(0.66,0.98) | 0.88(0.73,1.07) | 0.78(0.64,0.96) | 0.061 |
| Cardiovascular disease    |     |     |                 |                 |                 |       |
|                           | Yes | Ref | 1.02(0.73,1.43) | 1.03(0.69,1.54) | 1.23(0.85,1.78) | 0.796 |
|                           | No  | Ref | 0.85(0.75,0.97) | 0.87(0.75,1.00) | 0.74(0.62,0.88) | 0.003 |
| Folic acid supplement use |     |     |                 |                 |                 |       |
|                           | Yes | Ref | 0.96(0.73,1.25) | 0.83(0.64,1.07) | 0.68(0.50,0.93) | 0.045 |
|                           | No  | Ref | 0.80(0.68,0.94) | 0.84(0.71,1.00) | 0.72(0.60,0.85) | 0.001 |

a Ref indicated the reference group.

b Q, quartile.

c Data were listed as odds risk and 95% confidence intervals.

d Adjustments included age, sex, race/ethnicity, PIR, education level, physical activity level, drinking, smoking, BMI, disease history of diabetes, disease history of hypertension, disease history of dyslipidemia, disease history of cardiovascular disease, energy, vitamin B12, and diet quality.

Supplementary Table 13 Association of the intake of food natural folate with biological age indicators stratified by variables of interest.

|                         |          | Food natural folate (DFE, mcg/d)           |                  |                  |                  | P value |
|-------------------------|----------|--------------------------------------------|------------------|------------------|------------------|---------|
|                         |          | <sup>b</sup> Q1<br><sup>c</sup> OR (95%CI) | Q2<br>OR (95%CI) | Q3<br>OR (95%CI) | Q4<br>OR (95%CI) |         |
| PA                      |          |                                            |                  |                  |                  |         |
| Age                     | <65      | <sup>a</sup> Ref                           | 0.85(0.73,0.98)  | 0.73(0.63,0.86)  | 0.65(0.55,0.75)  | <0.001  |
|                         | ≥65      | Ref                                        | 0.85(0.68,1.05)  | 0.73(0.53,0.99)  | 0.63(0.47,0.84)  | 0.007   |
| Sex                     | Male     | Ref                                        | 0.66(0.57,0.77)  | 0.62(0.51,0.75)  | 0.55(0.45,0.67)  | <0.001  |
|                         | Female   | Ref                                        | 1.07(0.89,1.30)  | 1.05(0.86,1.29)  | 0.82(0.65,1.02)  | 0.407   |
| Smoking                 | Yes      | Ref                                        | 0.87(0.73,1.03)  | 0.70(0.58,0.85)  | 0.69(0.57,0.84)  | 0.001   |
|                         | No       | Ref                                        | 0.89(0.76,1.04)  | 0.76(0.62,0.94)  | 0.63(0.51,0.76)  | <0.001  |
| Drinking                | None     | Ref                                        | 0.92(0.81,1.06)  | 0.84(0.72,0.99)  | 0.69(0.58,0.81)  | <0.001  |
|                         | Moderate | Ref                                        | 0.90(0.67,1.21)  | 0.82(0.57,1.17)  | 0.91(0.60,1.38)  | 0.822   |
|                         | Heavy    | Ref                                        | 0.68(0.50,0.92)  | 0.54(0.38,0.76)  | 0.43(0.31,0.60)  | <0.001  |
| Physical activity level | Mild     | Ref                                        | 0.97(0.85,1.11)  | 0.81(0.69,0.95)  | 0.73(0.60,0.88)  | 0.004   |
|                         | Moderate | Ref                                        | 0.82(0.67,1.01)  | 0.76(0.60,0.97)  | 0.54(0.42,0.68)  | <0.001  |
| BMI                     | <30      | Ref                                        | 0.77(0.65,0.91)  | 0.61(0.51,0.73)  | 0.52(0.43,0.64)  | <0.001  |
|                         | ≥30      | Ref                                        | 1.05(0.90,1.23)  | 1.09(0.87,1.37)  | 0.89(0.71,1.12)  | 0.998   |



|                         |                           |          |                 |                 |                 |                 |        |
|-------------------------|---------------------------|----------|-----------------|-----------------|-----------------|-----------------|--------|
| KDM                     | Cardiovascular disease    |          |                 |                 |                 |                 |        |
|                         |                           | Yes      | Ref             | 1.03(0.73,1.44) | 0.93(0.61,1.41) | 0.77(0.48,1.21) | 0.756  |
|                         |                           | No       | Ref             | 0.86(0.74,0.98) | 0.72(0.62,0.84) | 0.64(0.55,0.75) | <0.001 |
|                         | Folic acid supplement use |          |                 |                 |                 |                 |        |
|                         |                           | Yes      | Ref             | 0.82(0.62,1.09) | 0.77(0.58,1.02) | 0.64(0.45,0.91) | 0.043  |
|                         |                           | No       | Ref             | 0.90(0.78,1.03) | 0.73(0.62,0.85) | 0.64(0.56,0.74) | <0.001 |
|                         | Age                       |          |                 |                 |                 |                 |        |
|                         |                           | <65      | Ref             | 0.86(0.72,1.01) | 0.74(0.61,0.90) | 0.63(0.50,0.79) | <0.001 |
|                         |                           | ≥65      | Ref             | 1.12(0.83,1.50) | 1.01(0.72,1.43) | 0.60(0.38,0.94) | 0.041  |
|                         | Sex                       |          |                 |                 |                 |                 |        |
|                         |                           | Male     | Ref             | 0.61(0.47,0.79) | 0.53(0.39,0.72) | 0.92(0.72,1.18) | <0.001 |
|                         |                           | Female   | Ref             | 0.84(0.65,1.08) | 0.75(0.56,1.00) | 0.94(0.74,1.19) | 0.040  |
|                         | Smoking                   |          |                 |                 |                 |                 |        |
|                         |                           | Yes      | Ref             | 0.76(0.59,0.98) | 0.68(0.51,0.93) | 0.88(0.71,1.09) | 0.007  |
|                         |                           | No       | Ref             | 0.73(0.57,0.93) | 0.55(0.41,0.75) | 0.94(0.77,1.14) | <0.001 |
|                         | Drinking                  |          |                 |                 |                 |                 |        |
|                         |                           | None     | Ref             | 0.89(0.74,1.08) | 0.62(0.48,0.80) | 0.78(0.52,1.17) | <0.001 |
|                         |                           | Moderate | Ref             | 0.84(0.53,1.33) | 0.74(0.42,1.31) | 0.66(0.44,0.98) | 0.376  |
|                         |                           | Heavy    | Ref             | 0.51(0.31,0.84) | 0.86(0.72,1.02) | 0.84(0.68,1.04) | 0.010  |
| Physical activity level |                           |          |                 |                 |                 |                 |        |
|                         | Mild                      | Ref      | 0.86(0.72,1.02) | 0.84(0.68,1.04) | 0.60(0.46,0.77) | <0.001          |        |
|                         | Moderate                  | Ref      | 0.82(0.64,1.06) | 0.63(0.47,0.83) | 0.54(0.40,0.74) | <0.001          |        |
| BMI                     |                           |          |                 |                 |                 |                 |        |
|                         | <30                       | Ref      | 0.90(0.71,1.13) | 0.89(0.67,1.18) | 0.60(0.44,0.81) | 0.003           |        |

|    |                           |          |     |                 |                 |                 |        |
|----|---------------------------|----------|-----|-----------------|-----------------|-----------------|--------|
| HD | Cardiovascular disease    | ≥30      | Ref | 0.77(0.61,0.98) | 0.66(0.52,0.85) | 0.61(0.47,0.80) | <0.001 |
|    |                           | Yes      | Ref | 0.78(0.52,1.18) | 0.70(0.42,1.15) | 0.60(0.37,0.98) | 0.052  |
|    |                           | No       | Ref | 0.92(0.78,1.09) | 0.75(0.62,0.92) | 0.61(0.49,0.77) | <0.001 |
|    | Folic acid supplement use | Yes      | Ref | 0.92(0.65,1.31) | 0.77(0.50,1.19) | 0.65(0.38,1.11) | 0.087  |
|    |                           | No       | Ref | 0.60(0.47,0.76) | 0.77(0.63,0.95) | 0.85(0.72,1.02) | <0.001 |
|    | Age                       | <65      | Ref | 0.96(0.83,1.12) | 0.95(0.79,1.14) | 0.84(0.70,0.99) | 0.123  |
|    |                           | ≥65      | Ref | 0.77(0.61,0.96) | 0.87(0.65,1.15) | 0.71(0.55,0.93) | 0.036  |
|    | Sex                       | Male     | Ref | 0.98(0.81,1.19) | 0.79(0.64,0.96) | 0.92(0.75,1.13) | 0.060  |
|    |                           | Female   | Ref | 0.90(0.75,1.09) | 0.87(0.70,1.08) | 0.84(0.66,1.06) | 0.407  |
|    | Smoking                   | Yes      | Ref | 0.85(0.72,1.01) | 0.82(0.67,1.02) | 0.78(0.62,0.98) | 0.093  |
|    |                           | No       | Ref | 0.92(0.76,1.11) | 0.90(0.75,1.07) | 0.84(0.70,1.02) | 0.213  |
|    | Drinking                  | None     | Ref | 0.88(0.75,1.03) | 0.91(0.77,1.08) | 0.87(0.71,1.05) | 0.311  |
|    |                           | Moderate | Ref | 1.07(0.77,1.48) | 1.41(1.00,1.98) | 1.18(0.76,1.83) | 0.143  |
|    |                           | Heavy    | Ref | 0.67(0.46,0.96) | 0.59(0.40,0.88) | 0.74(0.50,1.09) | 0.028  |
|    | Physical activity level   | Mild     | Ref | 0.90(0.76,1.07) | 0.91(0.74,1.11) | 0.81(0.66,0.98) | 0.096  |
|    |                           | Moderate | Ref | 0.93(0.78,1.10) | 0.91(0.71,1.16) | 0.80(0.65,0.98) | 0.086  |
|    | BMI                       |          |     |                 |                 |                 |        |

|                           |          |     |                 |                 |                 |       |
|---------------------------|----------|-----|-----------------|-----------------|-----------------|-------|
|                           | <30      | Ref | 0.86(0.73,1.02) | 0.78(0.64,0.95) | 0.73(0.58,0.93) | 0.031 |
|                           | ≥30      | Ref | 1.04(0.87,1.25) | 1.25(1.00,1.55) | 1.01(0.79,1.28) | 0.145 |
| Cardiovascular disease    |          |     |                 |                 |                 |       |
|                           | Yes      | Ref | 0.73(0.53,1.02) | 0.62(0.40,0.94) | 0.61(0.40,0.95) | 0.078 |
|                           | No       | Ref | 0.93(0.81,1.05) | 0.91(0.78,1.04) | 0.84(0.71,0.97) | 0.067 |
| Folic acid supplement use |          |     |                 |                 |                 |       |
|                           | Yes      | Ref | 0.81(0.64,1.03) | 0.81(0.62,1.05) | 0.78(0.61,1.01) | 0.169 |
|                           | No       | Ref | 0.95(0.81,1.10) | 0.83(0.72,0.97) | 0.81(0.67,0.97) | 0.057 |
| AL                        |          |     |                 |                 |                 |       |
| Age                       |          |     |                 |                 |                 |       |
|                           | <65      | Ref | 0.90(0.78,1.04) | 0.83(0.72,0.96) | 0.77(0.64,0.93) | 0.088 |
|                           | ≥65      | Ref | 0.98(0.82,1.17) | 0.81(0.65,1.01) | 0.65(0.50,0.85) | 0.006 |
| Sex                       |          |     |                 |                 |                 |       |
|                           | Male     | Ref | 0.76(0.65,0.89) | 0.71(0.57,0.88) | 0.64(0.50,0.80) | 0.001 |
|                           | Female   | Ref | 1.03(0.84,1.27) | 0.99(0.82,1.20) | 0.90(0.73,1.11) | 0.924 |
| Smoking                   |          |     |                 |                 |                 |       |
|                           | Yes      | Ref | 0.94(0.78,1.12) | 0.83(0.70,1.00) | 0.78(0.62,0.98) | 0.106 |
|                           | No       | Ref | 0.85(0.73,0.99) | 0.88(0.75,1.04) | 0.71(0.58,0.88) | 0.005 |
| Drinking                  |          |     |                 |                 |                 |       |
|                           | None     | Ref | 1.03(0.89,1.18) | 0.92(0.77,1.10) | 0.79(0.65,0.95) | 0.045 |
|                           | Moderate | Ref | 0.84(0.63,1.12) | 0.86(0.61,1.21) | 0.96(0.66,1.39) | 0.676 |
|                           | Heavy    | Ref | 0.83(0.60,1.14) | 0.71(0.49,1.01) | 0.78(0.57,1.06) | 0.172 |
| Physical activity level   |          |     |                 |                 |                 |       |
|                           | Mild     | Ref | 0.95(0.82,1.10) | 0.92(0.78,1.09) | 0.73(0.60,0.90) | 0.009 |
|                           | Moderate | Ref | 0.95(0.77,1.16) | 0.79(0.62,1.00) | 0.75(0.58,0.97) | 0.084 |

|                           |     |     |                 |                 |                 |       |  |
|---------------------------|-----|-----|-----------------|-----------------|-----------------|-------|--|
| BMI                       |     |     |                 |                 |                 |       |  |
|                           | <30 | Ref | 0.93(0.78,1.10) | 0.77(0.64,0.92) | 0.76(0.63,0.91) | 0.010 |  |
|                           | ≥30 | Ref | 1.05(0.85,1.29) | 1.06(0.87,1.30) | 0.93(0.72,1.20) | 1.000 |  |
| Cardiovascular disease    |     |     |                 |                 |                 |       |  |
|                           | Yes | Ref | 0.92(0.64,1.32) | 0.93(0.63,1.38) | 0.88(0.58,1.33) | 1.000 |  |
|                           | No  | Ref | 0.94(0.83,1.07) | 0.83(0.72,0.95) | 0.76(0.65,0.90) | 0.005 |  |
| Folic acid supplement use |     |     |                 |                 |                 |       |  |
|                           | Yes | Ref | 0.70(0.53,0.92) | 0.67(0.50,0.92) | 0.60(0.43,0.83) | 0.008 |  |
|                           | No  | Ref | 0.93(0.82,1.05) | 0.88(0.75,1.02) | 0.77(0.64,0.94) | 0.035 |  |

a Ref indicated the reference group.

b Q, quartile.

c Data were listed as odds risk and 95% confidence intervals.

d Adjustments included age, sex, race/ethnicity, PIR, education level, physical activity level, drinking, smoking, BMI, disease history of diabetes, disease history of hypertension, disease history of dyslipidemia, disease history of cardiovascular disease, energy, vitamin B12, and diet quality.

Supplementary Table 14 Association of the intake of food synthetic folic acid with biological age indicators stratified by variables of interest.

|                         |          | Food synthetic folic acid (DFE, mcg/d)     |                  |                  |                  | P value |
|-------------------------|----------|--------------------------------------------|------------------|------------------|------------------|---------|
|                         |          | <sup>b</sup> Q1<br><sup>c</sup> OR (95%CI) | Q2<br>OR (95%CI) | Q3<br>OR (95%CI) | Q4<br>OR (95%CI) |         |
| PA                      |          |                                            |                  |                  |                  |         |
| Age                     | <65      | <sup>a</sup> Ref                           | 0.94(0.80,1.10)  | 1.11(0.94,1.32)  | 0.92(0.78,1.08)  | 0.047   |
|                         | ≥65      | Ref                                        | 0.99(0.78,1.25)  | 1.08(0.84,1.39)  | 0.90(0.70,1.17)  | 0.461   |
| Sex                     | Male     | Ref                                        | 0.92(0.77,1.12)  | 1.14(0.94,1.38)  | 0.82(0.69,0.98)  | <0.001  |
|                         | Female   | Ref                                        | 1.08(0.90,1.30)  | 0.99(0.82,1.19)  | 1.09(0.91,1.30)  | 0.519   |
| Smoking                 | Yes      | Ref                                        | 0.89(0.76,1.04)  | 1.04(0.87,1.25)  | 0.82(0.69,0.98)  | 0.035   |
|                         | No       | Ref                                        | 1.11(0.94,1.32)  | 1.25(1.00,1.56)  | 1.09(0.91,1.32)  | 0.289   |
| Drinking                | None     | Ref                                        | 1.02(0.88,1.17)  | 1.20(1.03,1.40)  | 0.96(0.82,1.11)  | 0.015   |
|                         | Moderate | Ref                                        | 1.10(0.79,1.51)  | 1.24(0.90,1.72)  | 1.06(0.79,1.44)  | 0.596   |
|                         | Heavy    | Ref                                        | 0.92(0.64,1.33)  | 0.96(0.66,1.39)  | 0.82(0.58,1.16)  | 0.673   |
| Physical activity level | Mild     | Ref                                        | 0.90(0.79,1.04)  | 1.06(0.89,1.25)  | 0.95(0.81,1.11)  | 0.204   |
|                         | Moderate | Ref                                        | 1.20(0.95,1.51)  | 1.18(0.94,1.49)  | 0.89(0.71,1.10)  | 0.024   |
| BMI                     | <30      | Ref                                        | 0.89(0.75,1.05)  | 1.10(0.88,1.37)  | 0.79(0.66,0.95)  | 0.001   |
|                         | ≥30      | Ref                                        | 1.14(0.95,1.37)  | 1.14(0.93,1.39)  | 1.17(0.96,1.42)  | 0.390   |

|                         |                           |        |                 |                 |                 |                 |       |
|-------------------------|---------------------------|--------|-----------------|-----------------|-----------------|-----------------|-------|
| KDM                     | Cardiovascular disease    |        |                 |                 |                 |                 |       |
|                         |                           | Yes    | Ref             | 1.43(0.98,2.09) | 1.31(0.89,1.93) | 1.75(1.21,2.53) | 0.032 |
|                         |                           | No     | Ref             | 0.94(0.83,1.08) | 1.09(0.93,1.28) | 0.89(0.77,1.02) | 0.026 |
|                         | Folic acid supplement use |        |                 |                 |                 |                 |       |
|                         |                           | Yes    | Ref             | 1.23(0.96,1.56) | 1.44(1.04,1.98) | 1.25(0.97,1.62) | 0.177 |
|                         |                           | No     | Ref             | 0.91(0.80,1.05) | 1.02(0.87,1.20) | 0.85(0.73,0.99) | 0.043 |
|                         | Age                       |        |                 |                 |                 |                 |       |
|                         |                           | <65    | Ref             | 0.97(0.77,1.22) | 1.09(0.88,1.35) | 1.03(0.83,1.29) | 0.535 |
|                         |                           | ≥65    | Ref             | 1.25(0.86,1.81) | 1.17(0.82,1.66) | 0.83(0.58,1.19) | 0.285 |
|                         | Sex                       |        |                 |                 |                 |                 |       |
|                         |                           | Male   | Ref             | 1.03(0.76,1.39) | 0.90(0.69,1.18) | 0.94(0.71,1.24) | 0.414 |
|                         |                           | Female | Ref             | 1.01(0.78,1.31) | 1.07(0.85,1.35) | 1.11(0.86,1.45) | 0.472 |
|                         | Smoking                   |        |                 |                 |                 |                 |       |
|                         |                           | Yes    | Ref             | 1.1(0.85,1.42)  | 1.06(0.83,1.35) | 0.95(0.73,1.24) | 0.715 |
|                         |                           | No     | Ref             | 1.09(0.84,1.41) | 0.97(0.77,1.22) | 0.98(0.81,1.19) | 0.950 |
|                         | Drinking                  |        |                 |                 |                 |                 |       |
|                         |                           | None   | Ref             | 1.06(0.86,1.32) | 1.01(0.82,1.24) | 1.28(0.81,2.02) | 0.749 |
|                         | Moderate                  | Ref    | 1.36(0.82,2.26) | 1.19(0.74,1.93) | 1.02(0.66,1.59) | 0.453           |       |
|                         | Heavy                     | Ref    | 0.90(0.54,1.50) | 0.99(0.79,1.25) | 1.15(0.92,1.44) | 0.801           |       |
| Physical activity level |                           |        |                 |                 |                 |                 |       |
|                         | Mild                      | Ref    | 0.99(0.79,1.25) | 1.15(0.92,1.44) | 1.07(0.86,1.34) | 0.331           |       |
|                         | Moderate                  | Ref    | 1.06(0.78,1.45) | 1.23(0.93,1.63) | 0.84(0.61,1.16) | 0.477           |       |
| BMI                     |                           |        |                 |                 |                 |                 |       |
|                         | <30                       | Ref    | 0.93(0.71,1.21) | 1.03(0.80,1.32) | 1.07(0.84,1.36) | 0.422           |       |

|    |                           |          |     |                 |                 |                 |       |
|----|---------------------------|----------|-----|-----------------|-----------------|-----------------|-------|
| HD | Cardiovascular disease    | ≥30      | Ref | 1.11(0.83,1.48) | 1.17(0.88,1.54) | 0.92(0.69,1.23) | 0.691 |
|    |                           | Yes      | Ref | 0.93(0.62,1.38) | 1.33(0.93,1.89) | 1.13(0.75,1.7)  | 0.284 |
|    | Folic acid supplement use | No       | Ref | 1.00(0.81,1.23) | 1.07(0.87,1.33) | 1.00(0.81,1.23) | 0.877 |
|    |                           | Yes      | Ref | 1.36(0.84,2.19) | 1.31(0.79,2.16) | 1.22(0.73,2.06) | 0.493 |
|    | Age                       | No       | Ref | 1.00(0.82,1.22) | 1.08(0.89,1.32) | 0.94(0.78,1.14) | 0.680 |
|    |                           | <65      | Ref | 0.97(0.82,1.14) | 0.85(0.72,0.99) | 0.92(0.78,1.10) | 0.169 |
|    | Sex                       | ≥65      | Ref | 0.86(0.69,1.07) | 1.00(0.79,1.27) | 0.76(0.59,0.99) | 0.111 |
|    |                           | Male     | Ref | 0.81(0.67,0.98) | 0.77(0.64,0.93) | 0.70(0.59,0.83) | 0.002 |
|    | Smoking                   | Female   | Ref | 1.08(0.88,1.32) | 0.91(0.76,1.09) | 1.04(0.85,1.28) | 0.356 |
|    |                           | Yes      | Ref | 0.97(0.81,1.15) | 0.78(0.65,0.94) | 0.88(0.71,1.09) | 0.033 |
|    | Drinking                  | No       | Ref | 1.05(0.86,1.28) | 1.00(0.82,1.21) | 0.92(0.76,1.12) | 0.628 |
|    |                           | None     | Ref | 1.01(0.86,1.18) | 0.91(0.78,1.05) | 0.86(0.73,1.03) | 0.226 |
|    | Physical activity level   | Moderate | Ref | 1.12(0.80,1.58) | 1.19(0.89,1.59) | 1.20(0.88,1.62) | 0.612 |
|    |                           | Heavy    | Ref | 1.05(0.74,1.51) | 0.93(0.63,1.38) | 0.94(0.61,1.43) | 0.875 |
|    |                           | Mild     | Ref | 1.05(0.90,1.23) | 0.92(0.77,1.09) | 0.90(0.74,1.10) | 0.308 |
|    | BMI                       | Moderate | Ref | 0.91(0.73,1.13) | 0.90(0.73,1.11) | 0.80(0.63,1.02) | 0.318 |

|                         |                           |        |                 |                 |                 |                 |       |
|-------------------------|---------------------------|--------|-----------------|-----------------|-----------------|-----------------|-------|
| AL                      |                           | <30    | Ref             | 0.98(0.82,1.17) | 0.97(0.79,1.19) | 0.92(0.75,1.13) | 0.870 |
|                         |                           | ≥30    | Ref             | 1.05(0.85,1.30) | 0.87(0.68,1.11) | 0.98(0.79,1.21) | 0.267 |
|                         | Cardiovascular disease    |        |                 |                 |                 |                 |       |
|                         |                           | Yes    | Ref             | 0.90(0.65,1.23) | 0.92(0.67,1.27) | 1.07(0.75,1.54) | 0.644 |
|                         |                           | No     | Ref             | 0.97(0.83,1.13) | 0.87(0.74,1.03) | 0.88(0.75,1.04) | 0.250 |
|                         | Folic acid supplement use |        |                 |                 |                 |                 |       |
|                         |                           | Yes    | Ref             | 0.99(0.78,1.26) | 0.82(0.62,1.08) | 0.95(0.71,1.26) | 0.457 |
|                         |                           | No     | Ref             | 1.00(0.86,1.17) | 0.90(0.78,1.05) | 0.83(0.69,0.99) | 0.048 |
|                         | Age                       |        |                 |                 |                 |                 |       |
|                         |                           | <65    | Ref             | 0.89(0.76,1.03) | 0.91(0.79,1.05) | 0.87(0.75,1.01) | 0.268 |
|                         |                           | ≥65    | Ref             | 0.98(0.78,1.21) | 1.08(0.85,1.36) | 0.81(0.64,1.03) | 0.042 |
|                         | Sex                       |        |                 |                 |                 |                 |       |
|                         |                           | Male   | Ref             | 0.93(0.77,1.12) | 0.98(0.81,1.17) | 0.78(0.66,0.93) | 0.031 |
|                         |                           | Female | Ref             | 0.99(0.83,1.19) | 0.97(0.81,1.16) | 0.88(0.72,1.06) | 0.460 |
|                         | Smoking                   |        |                 |                 |                 |                 |       |
|                         |                           | Yes    | Ref             | 0.92(0.77,1.11) | 0.95(0.79,1.14) | 0.86(0.71,1.03) | 0.404 |
|                         | No                        | Ref    | 1.01(0.86,1.19) | 1.00(0.82,1.24) | 0.86(0.70,1.05) | 0.207           |       |
| Drinking                |                           |        |                 |                 |                 |                 |       |
|                         | None                      | Ref    | 1.00(0.85,1.18) | 1.02(0.88,1.18) | 0.85(0.73,0.99) | 0.075           |       |
|                         | Moderate                  | Ref    | 0.84(0.65,1.09) | 0.87(0.67,1.13) | 0.90(0.70,1.15) | 0.532           |       |
|                         | Heavy                     | Ref    | 0.84(0.58,1.22) | 0.79(0.54,1.15) | 0.74(0.52,1.06) | 0.437           |       |
| Physical activity level |                           |        |                 |                 |                 |                 |       |
|                         | Mild                      | Ref    | 1.00(0.87,1.16) | 1.01(0.85,1.20) | 0.84(0.70,1.02) | 0.152           |       |
|                         | Moderate                  | Ref    | 1.01(0.81,1.25) | 0.94(0.78,1.15) | 0.81(0.66,1.01) | 0.162           |       |



|                           |     |     |                 |                 |                 |       |
|---------------------------|-----|-----|-----------------|-----------------|-----------------|-------|
| BMI                       |     |     |                 |                 |                 |       |
|                           | <30 | Ref | 0.94(0.79,1.11) | 0.95(0.80,1.11) | 0.81(0.68,0.97) | 0.107 |
|                           | ≥30 | Ref | 1.01(0.83,1.24) | 0.89(0.73,1.08) | 0.91(0.73,1.12) | 0.566 |
| Cardiovascular disease    |     |     |                 |                 |                 |       |
|                           | Yes | Ref | 1.02(0.74,1.41) | 1.17(0.84,1.63) | 1.58(1.09,2.27) | 0.049 |
|                           | No  | Ref | 0.91(0.80,1.03) | 0.92(0.80,1.06) | 0.82(0.71,0.95) | 0.052 |
| Folic acid supplement use |     |     |                 |                 |                 |       |
|                           | Yes | Ref | 0.87(0.69,1.10) | 0.85(0.66,1.08) | 0.77(0.58,1.02) | 0.352 |
|                           | No  | Ref | 0.90(0.77,1.04) | 0.96(0.83,1.11) | 0.79(0.67,0.93) | 0.041 |

a Ref indicated the reference group.

b Q, quartile.

c Data were listed as odds risk and 95% confidence intervals.

d Adjustments included age, sex, race/ethnicity, PIR, education level, physical activity level, drinking, smoking, BMI, disease history of diabetes, disease history of hypertension, disease history of dyslipidemia, disease history of cardiovascular disease, energy, vitamin B12, and diet quality.

Supplementary Table 15 Association of dietary folate co-exposure patterns with biological age indicators stratified by variables of interest.

|         |           |                 | PA              | P value         | KDM             | P value         | HD              | P value         | AL              | P value |
|---------|-----------|-----------------|-----------------|-----------------|-----------------|-----------------|-----------------|-----------------|-----------------|---------|
| Age     |           |                 |                 |                 |                 |                 |                 |                 |                 |         |
| <65     | Cluster 1 | Ref             |                 |                 | Ref             |                 | Ref             |                 | Ref             |         |
|         | Cluster 2 | 0.87(0.76,1.00) | 0.056           | 0.56(0.44,0.71) | <0.001          | 0.97(0.83,1.14) | 0.714           | 0.95(0.85,1.07) | 0.380           |         |
|         | Cluster 3 | 0.73(0.55,0.97) | 0.032           | 0.98(0.83,1.15) | 0.810           | 0.95(0.72,1.26) | 0.736           | 1.00(0.75,1.33) | 0.975           |         |
|         | Cluster 4 | 0.88(0.61,1.28) | 0.504           | 0.76(0.49,1.16) | 0.198           | 0.96(0.67,1.36) | 0.794           | 0.88(0.63,1.24) | 0.467           |         |
|         | ≥65       | Cluster 1       | Ref             |                 | Ref             |                 | Ref             |                 | Ref             |         |
|         |           | Cluster 2       | 0.80(0.64,1.00) | 0.045           | 0.64(0.43,0.95) | 0.028           | 0.79(0.62,1.00) | 0.048           | 0.70(0.59,0.83) | <0.001  |
|         |           | Cluster 3       | 1.41(0.89,2.22) | 0.142           | 0.67(0.47,0.95) | 0.024           | 0.99(0.60,1.61) | 0.952           | 0.87(0.59,1.31) | 0.505   |
|         |           | Cluster 4       | 1.45(0.74,2.84) | 0.279           | 1.03(0.49,2.17) | 0.933           | 0.85(0.41,1.74) | 0.65            | 0.86(0.49,1.53) | 0.609   |
| Sex     |           |                 |                 |                 |                 |                 |                 |                 |                 |         |
| Male    | Cluster 1 | Ref             |                 | Ref             |                 | Ref             |                 | Ref             |                 |         |
|         | Cluster 2 | 0.81(0.69,0.94) | 0.005           | 0.49(0.36,0.66) | <0.001          | 0.82(0.72,0.95) | 0.008           | 0.82(0.69,0.96) | 0.017           |         |
|         | Cluster 3 | 0.85(0.63,1.14) | 0.278           | 0.85(0.7,1.03)  | 0.092           | 0.80(0.57,1.12) | 0.196           | 0.86(0.56,1.32) | 0.481           |         |
|         | Cluster 4 | 0.77(0.48,1.24) | 0.274           | 0.49(0.29,0.83) | 0.008           | 0.92(0.53,1.60) | 0.759           | 0.78(0.42,1.44) | 0.416           |         |
| Female  | Cluster 1 | Ref             |                 | Ref             |                 | Ref             |                 | Ref             |                 |         |
|         | Cluster 2 | 0.98(0.83,1.16) | 0.793           | 0.64(0.48,0.84) | 0.002           | 0.94(0.74,1.19) | 0.584           | 0.95(0.78,1.16) | 0.609           |         |
|         | Cluster 3 | 0.86(0.58,1.27) | 0.444           | 1.14(0.91,1.43) | 0.254           | 0.88(0.60,1.29) | 0.511           | 0.80(0.60,1.08) | 0.140           |         |
|         | Cluster 4 | 1.25(0.76,2.06) | 0.383           | 1.07(0.66,1.72) | 0.795           | 0.75(0.48,1.17) | 0.199           | 0.69(0.43,1.12) | 0.134           |         |
| Smoking |           |                 |                 |                 |                 |                 |                 |                 |                 |         |
| Yes     | Cluster 1 | Ref             |                 | Ref             |                 | Ref             |                 | Ref             |                 |         |
|         | Cluster 2 | 0.85(0.72,1.01) | 0.057           | 0.56(0.42,0.74) | <0.001          | 1.01(0.83,1.23) | 0.901           | 0.86(0.72,1.01) | 0.072           |         |
|         | Cluster 3 | 1.00(0.72,1.38) | 0.999           | 0.96(0.78,1.18) | 0.670           | 1.13(0.82,1.56) | 0.446           | 1.26(0.84,1.89) | 0.255           |         |
|         | Cluster 4 | 1.25(0.81,1.91) | 0.307           | 0.88(0.48,1.60) | 0.666           | 0.93(0.52,1.64) | 0.789           | 0.96(0.50,1.82) | 0.895           |         |
| No      | Cluster 1 | Ref             |                 | Ref             |                 | Ref             |                 | Ref             |                 |         |

|                         |          |                 |                 |                 |                 |                 |                 |                 |                 |       |
|-------------------------|----------|-----------------|-----------------|-----------------|-----------------|-----------------|-----------------|-----------------|-----------------|-------|
| Drinking                |          | Cluster 2       | 0.89(0.74,1.08) | 0.237           | 0.58(0.45,0.76) | <0.001          | 0.82(0.68,0.98) | 0.031           | 0.87(0.74,1.02) | 0.081 |
|                         |          | Cluster 3       | 0.73(0.50,1.08) | 0.116           | 0.93(0.77,1.14) | 0.482           | 0.81(0.59,1.11) | 0.183           | 0.71(0.50,1.00) | 0.047 |
|                         |          | Cluster 4       | 0.82(0.52,1.31) | 0.405           | 0.77(0.48,1.23) | 0.274           | 0.82(0.53,1.26) | 0.356           | 0.79(0.51,1.21) | 0.277 |
|                         | None     | Cluster 1       | Ref             |                 | Ref             |                 | Ref             |                 | Ref             |       |
|                         |          | Cluster 2       | 0.87(0.75,1.00) | 0.042           | 0.57(0.46,0.69) | <0.001          | 0.83(0.71,0.97) | 0.019           | 0.81(0.70,0.94) | 0.005 |
|                         |          | Cluster 3       | 0.95(0.72,1.26) | 0.721           | 0.97(0.82,1.15) | 0.737           | 0.85(0.64,1.14) | 0.271           | 0.83(0.62,1.13) | 0.235 |
|                         |          | Cluster 4       | 1.05(0.69,1.59) | 0.828           | 0.90(0.57,1.40) | 0.624           | 0.98(0.64,1.52) | 0.943           | 0.88(0.57,1.36) | 0.571 |
|                         | Moderate | Cluster 1       | Ref             |                 | Ref             |                 | Ref             |                 | Ref             |       |
|                         |          | Cluster 2       | 1.04(0.79,1.36) | 0.796           | 0.51(0.30,0.86) | 0.012           | 1.16(0.85,1.59) | 0.335           | 1.00(0.79,1.28) | 0.975 |
|                         |          | Cluster 3       | 0.56(0.30,1.04) | 0.065           | 1.09(0.77,1.56) | 0.622           | 0.81(0.51,1.29) | 0.373           | 0.66(0.36,1.18) | 0.156 |
|                         |          | Cluster 4       | 0.68(0.36,1.27) | 0.223           | 0.58(0.23,1.45) | 0.241           | 0.77(0.34,1.74) | 0.523           | 0.75(0.37,1.53) | 0.430 |
|                         | Heavy    | Cluster 1       | Ref             |                 | Ref             |                 | Ref             |                 | Ref             |       |
| Cluster 2               |          | 0.69(0.50,0.94) | 0.021           | 0.72(0.43,1.21) | 0.211           | 0.89(0.63,1.25) | 0.485           | 0.68(0.50,0.94) | 0.021           |       |
| Cluster 3               |          | 0.97(0.55,1.71) | 0.921           | 0.81(0.53,1.25) | 0.336           | 1.10(0.65,1.88) | 0.724           | 1.67(0.96,2.93) | 0.071           |       |
| Cluster 4               |          | 1.29(0.63,2.62) | 0.480           | 0.64(0.23,1.73) | 0.372           | 0.51(0.22,1.18) | 0.112           | 1.02(0.47,2.18) | 0.969           |       |
| Physical activity level | Mild     | Cluster 1       | Ref             |                 | Ref             |                 | Ref             |                 | Ref             |       |
|                         |          | Cluster 2       | 0.96(0.82,1.12) | 0.605           | 0.60(0.47,0.77) | <0.001          | 0.92(0.76,1.12) | 0.416           | 0.86(0.72,1.01) | 0.070 |
|                         |          | Cluster 3       | 0.98(0.73,1.33) | 0.909           | 1.01(0.85,1.20) | 0.920           | 0.95(0.70,1.28) | 0.718           | 0.86(0.61,1.20) | 0.357 |
|                         |          | Cluster 4       | 0.65(0.40,1.03) | 0.068           | 0.70(0.42,1.15) | 0.157           | 0.99(0.65,1.50) | 0.945           | 0.94(0.58,1.51) | 0.786 |
|                         | Moderate | Cluster 1       | Ref             |                 | Ref             |                 | Ref             |                 | Ref             |       |
|                         |          | Cluster 2       | 0.74(0.61,0.91) | 0.005           | 0.52(0.38,0.72) | <0.001          | 0.83(0.68,1.01) | 0.066           | 0.83(0.70,0.99) | 0.035 |
|                         |          | Cluster 3       | 0.66(0.43,1.00) | 0.050           | 0.87(0.66,1.14) | 0.294           | 0.63(0.45,0.88) | 0.008           | 1.01(0.68,1.51) | 0.950 |
|                         |          | Cluster 4       | 1.60(0.99,2.57) | 0.054           | 0.97(0.55,1.73) | 0.924           | 0.65(0.38,1.11) | 0.109           | 0.91(0.54,1.54) | 0.726 |

BMI

|  |     |           |                 |        |                 |        |                 |       |                 |       |
|--|-----|-----------|-----------------|--------|-----------------|--------|-----------------|-------|-----------------|-------|
|  | <30 | Cluster 1 | Ref             |        | Ref             |        | Ref             |       | Ref             |       |
|  |     | Cluster 2 | 0.75(0.64,0.88) | <0.001 | 0.54(0.41,0.71) | <0.001 | 0.94(0.79,1.11) | 0.445 | 0.84(0.72,0.98) | 0.030 |
|  |     | Cluster 3 | 1.07(0.79,1.45) | 0.672  | 1.07(0.89,1.29) | 0.468  | 1.01(0.76,1.35) | 0.929 | 1.10(0.82,1.49) | 0.512 |
|  |     | Cluster 4 | 1.13(0.73,1.76) | 0.585  | 1.03(0.66,1.61) | 0.895  | 0.99(0.66,1.49) | 0.967 | 0.90(0.60,1.34) | 0.588 |
|  | ≥30 | Cluster 1 | Ref             |        | Ref             |        | Ref             |       | Ref             |       |
|  |     | Cluster 2 | 1.07(0.88,1.30) | 0.483  | 0.63(0.49,0.82) | 0.001  | 0.92(0.74,1.16) | 0.485 | 0.97(0.82,1.16) | 0.734 |
|  |     | Cluster 3 | 0.67(0.44,1.02) | 0.063  | 0.83(0.66,1.04) | 0.105  | 0.80(0.55,1.15) | 0.228 | 0.89(0.59,1.35) | 0.584 |
|  |     | Cluster 4 | 0.84(0.49,1.44) | 0.524  | 0.63(0.32,1.24) | 0.178  | 0.98(0.63,1.52) | 0.929 | 0.83(0.48,1.44) | 0.496 |

Cardiovascular disease

|  |     |           |                 |       |                 |        |                 |       |                 |       |
|--|-----|-----------|-----------------|-------|-----------------|--------|-----------------|-------|-----------------|-------|
|  | Yes | Cluster 1 | Ref             |       | Ref             |        | Ref             |       | Ref             |       |
|  |     | Cluster 2 | 1.10(0.79,1.53) | 0.561 | 0.65(0.42,1.02) | 0.061  | 1.33(0.96,1.86) | 0.089 | 1.44(1.03,2.01) | 0.034 |
|  |     | Cluster 3 | 0.74(0.34,1.63) | 0.451 | 1.08(0.73,1.59) | 0.717  | 1.05(0.57,1.93) | 0.868 | 0.92(0.43,1.95) | 0.823 |
|  |     | Cluster 4 | 1.58(0.69,3.59) | 0.274 | 0.65(0.29,1.49) | 0.308  | 1.50(0.62,3.65) | 0.363 | 1.14(0.44,2.99) | 0.786 |
|  | No  | Cluster 1 | Ref             |       | Ref             |        | Ref             |       | Ref             |       |
|  |     | Cluster 2 | 0.85(0.75,0.97) | 0.018 | 0.57(0.45,0.71) | <0.001 | 0.88(0.76,1.01) | 0.065 | 0.86(0.77,0.97) | 0.011 |
|  |     | Cluster 3 | 0.86(0.67,1.11) | 0.244 | 0.93(0.80,1.09) | 0.384  | 0.92(0.70,1.22) | 0.550 | 0.89(0.69,1.16) | 0.388 |
|  |     | Cluster 4 | 0.94(0.65,1.37) | 0.758 | 0.85(0.56,1.30) | 0.450  | 0.91(0.64,1.29) | 0.588 | 0.77(0.53,1.12) | 0.170 |

Folic acid supplement use

|  |     |           |                 |       |                 |        |                 |       |                 |       |
|--|-----|-----------|-----------------|-------|-----------------|--------|-----------------|-------|-----------------|-------|
|  | Yes | Cluster 1 | Ref             |       | Ref             |        | Ref             |       | Ref             |       |
|  |     | Cluster 2 | 0.97(0.66,1.41) | 0.864 | 0.76(0.50,1.16) | 0.200  | 0.80(0.48,1.30) | 0.357 | 0.68(0.47,0.98) | 0.039 |
|  |     | Cluster 3 | 0.87(0.66,1.16) | 0.340 | 0.90(0.53,1.55) | 0.707  | 0.90(0.65,1.24) | 0.508 | 0.88(0.68,1.12) | 0.285 |
|  |     | Cluster 4 | 1.03(0.71,1.48) | 0.882 | 1.09(0.66,1.80) | 0.727  | 0.94(0.63,1.40) | 0.768 | 0.82(0.58,1.16) | 0.258 |
|  | No  | Cluster 1 | Ref             |       | Ref             |        | Ref             |       | Ref             |       |
|  |     | Cluster 2 | 0.86(0.76,0.97) | 0.011 | 1.94(1.70,2.21) | <0.001 | 0.86(0.75,0.98) | 0.028 | 0.83(0.73,0.95) | 0.007 |

|           |                  |       |                 |       |                 |       |                 |       |    |
|-----------|------------------|-------|-----------------|-------|-----------------|-------|-----------------|-------|----|
| Cluster 3 | --               | --    | --              | --    | --              | --    | --              | --    | -- |
| Cluster 4 | 2.28(0.31,16.78) | 0.415 | 0.96(0.82,1.11) | 0.569 | 0.93(0.20,4.37) | 0.927 | 0.60(0.09,4.03) | 0.593 |    |

---

a Ref indicated the reference group.

b Q, quartile.

c Data were listed as odds risk and 95% confidence intervals.

d Adjustments included age, sex, race/ethnicity, PIR, education level, physical activity level, drinking, smoking, BMI, disease history of diabetes, disease history of hypertension, disease history of dyslipidemia, disease history of cardiovascular disease, energy, vitamin B12, and diet quality.

Supplementary Table 16 The association of the intake of folate from diverse sources with biological aging indicators after excluding participants with extreme values (> 99% and/or < 1%) of the Total folate.

|                                        | PA                  |                 | KDM      |                 | HD        |                 | AL        |                 |
|----------------------------------------|---------------------|-----------------|----------|-----------------|-----------|-----------------|-----------|-----------------|
|                                        | <sup>b</sup> Case/N | OR (95%CI)      | Case/N   | OR (95%CI)      | Case/N    | OR (95%CI)      | Case/N    | OR (95%CI)      |
| Total folate (DFE, mcg/d)              |                     |                 |          |                 |           |                 |           |                 |
| <sup>c</sup> Q1(≤350.00)               | 2113/4633           | Ref             | 889/4633 | Ref             | 2650/4633 | Ref             | 1723/4633 | Ref             |
| Q2(350.01 - <521.00)                   | 2035/4624           | 1.02(0.90,1.16) | 778/4624 | 0.97(0.83,1.12) | 2324/4624 | 0.87(0.77,0.98) | 1520/4624 | 0.98(0.85,1.12) |
| Q3(521.01 - <844.00)                   | 1955/4627           | 0.90(0.79,1.02) | 703/4627 | 0.94(0.78,1.12) | 2173/4627 | 0.86(0.74,1.01) | 1378/4627 | 0.91(0.78,1.06) |
| Q4(≥844.01)                            | 1747/4627           | 0.75(0.64,0.88) | 521/4627 | 0.65(0.54,0.77) | 2108/4627 | 0.68(0.55,0.83) | 1357/4627 | 0.69(0.58,0.82) |
| P trend                                |                     | <0.001          |          | 0.001           |           | 0.001           |           | <0.001          |
| Dietary folate (DFE, mcg/d)            |                     |                 |          |                 |           |                 |           |                 |
| Q1(<319.50)                            | 2144/4643           | Ref             | 842/4643 | Ref             | 2587/4643 | Ref             | 1706/4643 | Ref             |
| Q2(319.51 - <445.00)                   | 2017/4654           | 0.92(0.81,1.06) | 751/4654 | 0.91(0.76,1.08) | 2433/4654 | 0.83(0.72,0.95) | 1591/4654 | 0.83(0.73,0.95) |
| Q3(445.01 - <623.00)                   | 1916/4620           | 0.91(0.80,1.03) | 670/4620 | 0.90(0.74,1.09) | 2253/4620 | 0.87(0.75,1.01) | 1459/4620 | 0.89(0.77,1.04) |
| Q4(≥623.01)                            | 1773/4594           | 0.79(0.67,0.94) | 628/4594 | 0.83(0.68,0.98) | 1982/4594 | 0.79(0.67,0.94) | 1222/4594 | 0.74(0.64,0.86) |
| P trend                                |                     | 0.001           |          | 0.048           |           | 0.021           |           | 0.002           |
| Food natural folate (DFE, mcg/d)       |                     |                 |          |                 |           |                 |           |                 |
| Q1(<136.50)                            | 1931/4651           | Ref             | 881/4651 | Ref             | 2506/4651 | Ref             | 1631/4651 | Ref             |
| Q2(136.51 - <189.00)                   | 1960/4628           | 0.87(0.77,0.99) | 782/4628 | 0.91(0.78,1.07) | 2397/4628 | 0.87(0.77,0.99) | 1511/4628 | 0.91(0.81,1.03) |
| Q3(189.01- <259.00)                    | 2051/4620           | 0.74(0.64,0.86) | 660/4620 | 0.77(0.64,0.93) | 2272/4620 | 0.85(0.74,0.98) | 1503/4620 | 0.88(0.76,1.02) |
| Q4(≥259.01)                            | 1908/4612           | 0.65(0.56,0.75) | 568/4612 | 0.63(0.51,0.77) | 2080/4612 | 0.76(0.65,0.88) | 1333/4612 | 0.76(0.63,0.91) |
| P trend                                |                     | <0.001          |          | <0.001          |           | <0.001          |           | 0.003           |
| Food synthetic folic acid (DFE, mcg/d) |                     |                 |          |                 |           |                 |           |                 |

|                      |           |                 |          |                 |           |                 |           |                 |
|----------------------|-----------|-----------------|----------|-----------------|-----------|-----------------|-----------|-----------------|
| Q1(<82.50)           | 2043/4655 | Ref             | 751/4655 | Ref             | 2581/4655 | Ref             | 1674/4655 | Ref             |
| Q2(82.51- <138.50)   | 2054/4613 | 0.98(0.86,1.11) | 713/4613 | 1.04(0.85,1.27) | 2350/4613 | 1.00(0.87,1.15) | 1503/4613 | 0.94(0.83,1.08) |
| Q3(138.51 - <224.00) | 1986/4617 | 1.14(0.98,1.33) | 779/4617 | 1.17(0.95,1.44) | 2170/4617 | 0.90(0.78,1.04) | 1412/4617 | 0.99(0.86,1.14) |
| Q4( $\geq$ 224.01)   | 1767/4626 | 0.94(0.82,1.08) | 648/4626 | 1.05(0.87,1.28) | 2154/4626 | 0.90(0.77,1.06) | 1389/4626 | 0.83(0.73,0.96) |
| P trend              |           | 0.802           |          | 0.403           |           | 0.111           |           | 0.028           |

a Ref indicated the reference group.

b Case/N, the number of case subjects/total.

c Q, quartile.

d Data were listed as odds risk and 95% confidence intervals.

e Adjustments included age, sex, race/ethnicity, PIR, education level, physical activity level, drinking, smoking, BMI, disease history of diabetes, disease history of hypertension, disease history of dyslipidemia, disease history of cardiovascular disease, energy, vitamin B12, and diet quality.

Supplementary Table 17 The association of dietary folate co-exposure patterns with biological age indicators after excluding participants with extreme values (> 99% and/or < 1%) of the intake of total folate.

|     |           | Model 1             |                         |         | Model 2         |         | Model 3         |         | Model 4         |         |
|-----|-----------|---------------------|-------------------------|---------|-----------------|---------|-----------------|---------|-----------------|---------|
|     |           | <sup>b</sup> Case/N | <sup>c</sup> OR (95%CI) | P value | OR (95%CI)      | P value | OR (95%CI)      | P value | OR (95%CI)      | P value |
| PA  | Cluster 1 | 5343/12088          | <sup>a</sup> Ref        |         | Ref             |         | Ref             |         | Ref             |         |
|     | Cluster 2 | 1343/3282           | 0.75(0.68,0.84)         | <0.001  | 0.79(0.71,0.88) | <0.001  | 0.81(0.72,0.90) | <0.001  | 0.87(0.77,0.98) | 0.021   |
|     | Cluster 3 | 1025/2765           | 0.67(0.59,0.76)         | <0.001  | 0.79(0.69,0.90) | <0.001  | 0.95(0.77,1.18) | 0.638   | 0.83(0.66,1.05) | 0.115   |
|     | Cluster 4 | 139/376             | 0.67(0.49,0.92)         | 0.015   | 0.81(0.59,1.09) | 0.162   | 0.99(0.69,1.41) | 0.936   | 0.84(0.57,1.23) | 0.360   |
| KDM | Cluster 1 | 2091/12088          | Ref                     |         | Ref             |         | Ref             |         | Ref             |         |
|     | Cluster 2 | 469/3282            | 0.54(0.45,0.65)         | <0.001  | 0.60(0.50,0.71) | <0.001  | 0.62(0.52,0.75) | <0.001  | 0.58(0.47,0.7)  | <0.001  |
|     | Cluster 3 | 282/2765            | 0.80(0.70,0.92)         | 0.002   | 0.84(0.73,0.97) | 0.020   | 0.87(0.75,1.00) | 0.049   | 0.95(0.83,1.10) | 0.483   |
|     | Cluster 4 | 47/376              | 0.72(0.50,1.04)         | 0.076   | 0.80(0.55,1.15) | 0.223   | 0.86(0.60,1.26) | 0.440   | 0.82(0.55,1.22) | 0.326   |
| HD  | Cluster 1 | 6319/12088          | Ref                     |         | Ref             |         | Ref             |         | Ref             |         |
|     | Cluster 2 | 1400/3282           | 0.76(0.69,0.85)         | <0.001  | 0.79(0.71,0.88) | <0.001  | 0.81(0.73,0.89) | <0.001  | 0.85(0.75,0.97) | 0.016   |
|     | Cluster 3 | 1357/2765           | 0.80(0.69,0.91)         | 0.002   | 0.91(0.79,1.04) | 0.158   | 1.03(0.81,1.32) | 0.791   | 0.81(0.62,1.06) | 0.121   |
|     | Cluster 4 | 179/376             | 0.79(0.60,1.04)         | 0.087   | 0.91(0.70,1.19) | 0.485   | 1.04(0.76,1.43) | 0.805   | 0.80(0.55,1.15) | 0.222   |
| AL  | Cluster 1 | 4089/12088          | Ref                     |         | Ref             |         | Ref             |         | Ref             |         |
|     | Cluster 2 | 885/3282            | 0.73(0.65,0.83)         | <0.001  | 0.78(0.69,0.87) | <0.001  | 0.77(0.68,0.87) | <0.001  | 0.81(0.72,0.93) | 0.002   |
|     | Cluster 3 | 887/2765            | 0.80(0.71,0.91)         | 0.001   | 0.91(0.80,1.05) | 0.192   | 1.10(0.86,1.41) | 0.451   | 0.93(0.71,1.22) | 0.592   |
|     | Cluster 4 | 117/376             | 0.79(0.57,1.09)         | 0.150   | 0.92(0.67,1.26) | 0.583   | 1.11(0.75,1.63) | 0.593   | 0.92(0.59,1.45) | 0.724   |

a Ref indicated the reference group.

b Case/N, the number of case subjects/total.

c Data were listed as odds risk and 95% confidence intervals.

d Adjustments included age, sex, race/ethnicity, PIR, education level, physical activity level, drinking, smoking, BMI, disease history of diabetes, disease history of hypertension, disease history of dyslipidemia, disease history of cardiovascular disease, energy, vitamin B12, and diet quality.



Supplementary Table 18 The association of the intake of folate from diverse sources with biological age indicators after further adjusting the indices of liver and kidney function.

|                                        | PA                  |                         | KDM      |                 | HD        |                 | AL        |                 |
|----------------------------------------|---------------------|-------------------------|----------|-----------------|-----------|-----------------|-----------|-----------------|
|                                        | <sup>b</sup> Case/N | <sup>d</sup> OR (95%CI) | Case/N   | OR (95%CI)      | Case/N    | OR (95%CI)      | Case/N    | OR (95%CI)      |
| Total folate (DFE, mcg/d)              |                     |                         |          |                 |           |                 |           |                 |
| <sup>b</sup> Q1(≤347.00)               | 2172/4728           | <sup>a</sup> Ref        | 930/4728 | Ref             | 2708/4728 | Ref             | 1774/4728 | Ref             |
| Q2(347.01 - <521.01)                   | 2071/4720           | 1.00(0.88,1.13)         | 789/4720 | 0.64(0.54,0.76) | 2369/4720 | 0.86(0.76,0.97) | 1546/4720 | 0.94(0.82,1.08) |
| Q3(521.01 - <853.00)                   | 1994/4727           | 0.89(0.78,1.02)         | 715/4727 | 0.90(0.76,1.07) | 2213/4727 | 0.85(0.73,0.99) | 1404/4727 | 0.89(0.76,1.03) |
| Q4(≥853.01)                            | 1784/4714           | 0.76(0.66,0.89)         | 538/4714 | 0.93(0.80,1.07) | 2154/4714 | 0.69(0.56,0.84) | 1397/4714 | 0.69(0.58,0.83) |
| P trend                                |                     | 0.004                   |          | <0.001          |           | 0.022           |           | 0.003           |
| Dietary folate (DFE, mcg/d)            |                     |                         |          |                 |           |                 |           |                 |
| Q1(<316.00)                            | 1977/4744           | Ref                     | 777/4744 | Ref             | 2551/4744 | Ref             | 1661/4744 | Ref             |
| Q2(316.51 - <444.00)                   | 1998/4703           | 0.95(0.83,1.09)         | 734/4703 | 0.81(0.66,0.99) | 2442/4703 | 0.84(0.73,0.96) | 1546/4703 | 0.85(0.74,0.97) |
| Q3(444.01 - <624.50)                   | 2104/4738           | 0.91(0.80,1.04)         | 795/4738 | 0.88(0.73,1.07) | 2334/4738 | 0.87(0.75,1.02) | 1542/4738 | 0.91(0.78,1.06) |
| Q4(≥624.51)                            | 1942/4704           | 0.83(0.72,0.95)         | 666/4704 | 0.90(0.75,0.98) | 2117/4704 | 0.80(0.68,0.94) | 1354/4704 | 0.75(0.64,0.88) |
| P trend                                |                     | 0.001                   |          | 0.044           |           | 0.002           |           | <0.001          |
| Food natural folate (DFE, mcg/d)       |                     |                         |          |                 |           |                 |           |                 |
| Q1(<135.00)                            | 2084/4732           | Ref                     | 845/4732 | Ref             | 2625/4732 | Ref             | 1712/4732 | Ref             |
| Q2(135.01 - <188.00)                   | 2108/4727           | 0.85(0.75,0.98)         | 833/4727 | 0.62(0.50,0.77) | 2409/4727 | 0.90(0.78,1.03) | 1542/4727 | 0.87(0.77,1.00) |
| Q3(188.01 - <258.50)                   | 2018/4708           | 0.73(0.62,0.84)         | 738/4708 | 0.75(0.62,0.90) | 2210/4708 | 0.86(0.75,0.99) | 1437/4708 | 0.86(0.75,1.00) |
| Q4(≥258.51)                            | 1811/4722           | 0.66(0.57,0.77)         | 556/4722 | 0.91(0.78,1.06) | 2200/4722 | 0.78(0.68,0.91) | 1412/4722 | 0.75(0.62,0.90) |
| P trend                                |                     | <0.001                  |          | <0.001          |           | <0.001          |           | 0.004           |
| Food synthetic folic acid (DFE, mcg/d) |                     |                         |          |                 |           |                 |           |                 |

|                      |           |                 |          |                 |           |                 |           |                 |
|----------------------|-----------|-----------------|----------|-----------------|-----------|-----------------|-----------|-----------------|
| Q1(<81.00)           | 2097/4730 | Ref             | 881/4730 | Ref             | 2667/4730 | Ref             | 1768/4730 | Ref             |
| Q2(81.01- <137.50)   | 2029/4722 | 0.99(0.88,1.12) | 766/4722 | 1.02(0.85,1.25) | 2413/4722 | 0.99(0.87,1.14) | 1545/4722 | 0.96(0.83,1.10) |
| Q3(137.51 - <224.50) | 1974/4719 | 1.16(0.99,1.35) | 685/4719 | 1.13(0.93,1.38) | 2303/4719 | 0.90(0.78,1.04) | 1509/4719 | 1.01(0.88,1.16) |
| Q4( $\geq$ 224.51)   | 1921/4718 | 0.96(0.84,1.10) | 640/4718 | 1.03(0.83,1.25) | 2061/4718 | 0.90(0.77,1.05) | 1281/4718 | 0.84(0.73,0.97) |
| P trend              |           | 0.989           |          | 0.583           |           | 0.095           |           | 0.049           |

a Ref indicated the reference group.

b Case/N, the number of case subjects/total.

c Q, quartile.

d Data were listed as odds risk and 95% confidence intervals.

e Adjustments included age, sex, race/ethnicity, PIR, education level, physical activity level, drinking, smoking, BMI, disease history of diabetes, disease history of hypertension, disease history of dyslipidemia, disease history of cardiovascular disease, energy, vitamin B12, diet quality, ALT, AST, and eGRP.

Supplementary Table 19 The association of dietary folate co-exposure patterns with biological age indicators after further adjusting the indices of liver and kidney function.

|     |           | Dietary folate co-exposure patterns |                         |         |
|-----|-----------|-------------------------------------|-------------------------|---------|
|     |           | <sup>b</sup> Case/N                 | <sup>c</sup> OR (95%CI) | P value |
| PA  | Cluster 1 | 5438/12279                          | <sup>a</sup> Ref        |         |
|     | Cluster 2 | 1344/3285                           | 0.88(0.78,0.99)         | 0.039   |
|     | Cluster 3 | 1025/2765                           | 0.88(0.69,1.11)         | 0.263   |
|     | Cluster 4 | 214/560                             | 1.02(0.73,1.44)         | 0.895   |
| KDM | Cluster 1 | 2143/12279                          | Ref                     |         |
|     | Cluster 2 | 470/3285                            | 0.58(0.48,0.70)         | <0.001  |
|     | Cluster 3 | 282/2765                            | 0.83(0.56,1.24)         | 0.353   |
|     | Cluster 4 | 77/560                              | 0.95(0.83,1.10)         | 0.496   |
| HD  | Cluster 1 | 6421/12279                          | Ref                     |         |
|     | Cluster 2 | 1400/3285                           | 0.86(0.75,0.98)         | 0.020   |
|     | Cluster 3 | 1357/2765                           | 0.82(0.63,1.06)         | 0.130   |
|     | Cluster 4 | 266/560                             | 0.81(0.58,1.12)         | 0.192   |
| AL  | Cluster 1 | 4166/12279                          | Ref                     |         |
|     | Cluster 2 | 885/3285                            | 0.82(0.72,0.94)         | 0.004   |
|     | Cluster 3 | 887/2765                            | 0.93(0.70,1.24)         | 0.626   |
|     | Cluster 4 | 165/560                             | 0.88(0.60,1.30)         | 0.520   |

a Ref indicated the reference group.

b Case/N, the number of case subjects/total.

c Data were listed as odds risk and 95% confidence intervals.

d Adjustments included age, sex, race/ethnicity, PIR, education level, physical activity level, drinking, smoking, BMI, disease history of diabetes, disease history of hypertension, disease history of dyslipidemia, disease history of cardiovascular disease, energy, vitamin B12, and diet quality.

Supplementary Table 20 The Association of the intake of total folate with biological age indicators after further dividing the intake of total folate into group according to the Dietary Guidelines for Americans 2020-2025.

|     |                        | Total folate (DFE, mcg/d)    |                            |                                        | P trend         |        |
|-----|------------------------|------------------------------|----------------------------|----------------------------------------|-----------------|--------|
|     |                        | Insufficient group<br>(<400) | Normal group<br>(400-1000) | Over-supplementary<br>group<br>(>1000) |                 |        |
| PA  | <sup>b</sup> Case/N    | 2877/6270                    | 4449/10770                 | 695/1849                               |                 |        |
|     |                        | Model 1                      | <sup>a</sup> Ref           | 0.73(0.67,0.79)                        | 0.59(0.50,0.70) | <0.001 |
|     | <sup>d</sup> OR(95%CI) | Model 2                      | Ref                        | 0.80(0.74,0.87)                        | 0.72(0.61,0.85) | <0.001 |
|     |                        | Model 3                      | Ref                        | 0.85(0.76,0.94)                        | 0.81(0.68,0.98) | 0.002  |
|     |                        | Model 4                      | Ref                        | 0.88(0.79,0.98)                        | 0.85(0.69,1.05) | 0.054  |
| KDM | Case/N                 | 1202/6270                    | 1564/10770                 | 206/1849                               |                 |        |
|     |                        | Model 1                      | Ref                        | 0.74(0.65,0.84)                        | 0.49(0.40,0.61) | <0.001 |
|     | OR (95%CI)             | Model 2                      | Ref                        | 0.81(0.71,0.92)                        | 0.57(0.46,0.71) | <0.001 |
|     |                        | Model 3                      | Ref                        | 0.83(0.72,0.95)                        | 0.59(0.47,0.75) | <0.001 |
|     |                        | Model 4                      | Ref                        | 0.85(0.74,0.99)                        | 0.58(0.45,0.75) | <0.001 |
| HD  | Case/N                 | 3495/6270                    | 5106/10770                 | 843/1849                               |                 |        |
|     |                        | Model 1                      | Ref                        | 0.79(0.72,0.87)                        | 0.66(0.56,0.78) | <0.001 |
|     | OR (95%CI)             | Model 2                      | Ref                        | 0.85(0.77,0.93)                        | 0.76(0.64,0.90) | <0.001 |
|     |                        | Model 3                      | Ref                        | 0.86(0.78,0.96)                        | 0.76(0.63,0.91) | 0.001  |
|     |                        | Model 4                      | Ref                        | 0.88(0.79,0.99)                        | 0.73(0.59,0.91) | 0.004  |
| AL  | Case/N                 | 2274/6270                    | 3289/10070                 | 540/1849                               |                 |        |

| OR (95%CI) | Model 1 | Model 2         | Model 3         | Model 4 |
|------------|---------|-----------------|-----------------|---------|
|            | Ref     | 0.81(0.73,0.91) | 0.66(0.55,0.80) | <0.001  |
|            | Ref     | 0.89(0.80,0.97) | 0.78(0.64,0.95) | 0.006   |
|            | Ref     | 0.89(0.79,0.97) | 0.78(0.63,0.97) | 0.021   |
|            | Ref     | 0.93(0.82,0.99) | 0.80(0.64,1.05) | 0.058   |

a Ref indicated the reference group.

b Case/N, the number of case subjects/total.

c Q, quintile.

d Data were listed as odds risk and 95% confidence intervals.

e Adjustments included age, sex, race/ethnicity, PIR, education level, physical activity level, drinking, smoking, BMI, disease history of diabetes, disease history of hypertension, disease history of dyslipidemia, disease history of cardiovascular disease, energy, vitamin B12, and diet quality.
